# Supplementary material for: Identification and Comprehensive Genome-Wide Analysis of Glutathione S-Transferase Gene Family in Sweet Cherry (Prunus avium) and Their Expression Profiling Reveals a Likely Role in Anthocyanin Accumulation
Source: Front Plant Sci. 2022 Jul 12;13:938800. doi: 10.3389/fpls.2022.938800 (PMC9315441; doi:10.3389/fpls.2022.938800)
Supplement: Supplementary file 1 [file Table_1.XLSX]

## Sheet: Sheet1
Table S1 Physico-chemical characterization of GST genes in Prunus avium
Gene ID	Given Name	Number of chromosome	Domains	Amino acid	Molecular weight	Theoretical pI
Pav_sc0000085.1_g320.1.mk	PavGST1	Chr1	1	322	36143.3	8.86
Pav_sc0000119.1_g430.1.mk	PavGST2	Chr1	1	222	25600.6	6.93
Pav_sc0000207.1_g700.1.br	PavGST3	Chr1	2	172	19883	6.96
Pav_sc0000207.1_g720.1.mk	PavGST4	Chr1	2	226	25845	6.4
Pav_sc0000207.1_g840.1.mk	PavGST5	Chr1	2	223	25529.9	6.01
Pav_sc0000207.1_g850.1.mk	PavGST6	Chr1	2	224	25931.2	7.06
Pav_sc0000207.1_g860.1.br	PavGST7	Chr1	2	223	26172.5	5.52
Pav_sc0000257.1_g600.1.mk	PavGST8	Chr1	1	113	12556.6	5.21
Pav_sc0000359.1_g580.1.br	PavGST9	Chr1	1	170	19276.3	9.64
Pav_sc0000745.1_g320.1.mk	PavGST10	Chr1	2	222	25973.1	5.4
Pav_sc0001196.1_g1310.1.mk	PavGST11	Chr1	3	427	48660.1	6.02
Pav_sc0001196.1_g2210.1.mk	PavGST12	Chr1	2	221	25021.7	5.62
Pav_sc0001275.1_g020.1.mk	PavGST13	Chr1	2	212	24830.9	9.07
Pav_sc0002136.1_g320.1.mk	PavGST14	Chr1	3	421	47959.3	6.18
Pav_sc0002584.1_g240.1.mk	PavGST15	Chr1	1	151	16273	5.53
Pav_sc0007796.1_g150.1.mk	PavGST16	Chr1	2	221	24921.3	6.84
Pav_sc0000554.1_g2030.1.mk	PavGST17	Chr2	2	212	23728.3	6
Pav_sc0000789.1_g340.1.mk	PavGST18	Chr2	2	307	34575.4	8.8
Pav_sc0001708.1_g040.1.mk	PavGST19	Chr2	2	219	25198.2	5.61
Pav_sc0001708.1_g050.1.br	PavGST20	Chr2	2	224	25682.8	6.05
Pav_sc0001708.1_g060.1.mk	PavGST21	Chr2	2	175	19983	5.4
Pav_sc0001708.1_g070.1.br	PavGST22	Chr2	2	224	25876	5.93
Pav_sc0002998.1_g130.1.mk	PavGST23	Chr2	1	231	26134	5.86
Pav_sc0000464.1_g360.1.mk	PavGST24	Chr3	2	80	8622.08	11.63
Pav_sc0001124.1_g450.1.mk	PavGST25	Chr3	2	215	24543.3	5.67
Pav_sc0001215.1_g320.1.mk	PavGST26	Chr3	2	232
Pav_sc0000095.1_g650.1.mk	PavGST27	Chr4	2	219	25332.5	5.87
Pav_sc0000095.1_g700.1.br	PavGST28	Chr4	2	216	24862.4	5.7
Pav_sc0000095.1_g710.1.br	PavGST29	Chr4	2	221	25493.4	5.43
Pav_sc0000095.1_g720.1.br	PavGST30	Chr4	2	199	22872.3	5.14
Pav_sc0000095.1_g730.1.mk	PavGST31	Chr4	2	220	25229.1	5.85
Pav_sc0000095.1_g760.1.br	PavGST32	Chr4	1	129	14978.9	5.24
Pav_sc0000095.1_g770.1.mk	PavGST33	Chr4	2	213	24834.4	5.78
Pav_sc0000095.1_g790.1.mk	PavGST34	Chr4	2	219	25274.2	6.25
Pav_sc0000095.1_g800.1.mk	PavGST35	Chr4	1	136	15895.6	9.4
Pav_sc0000095.1_g850.1.br	PavGST36	Chr4	2	219	25100.1	6.97
Pav_sc0001990.1_g130.1.mk	PavGST37	Chr4	2	174	19109.1	6.11
Pav_sc0000103.1_g250.1.mk	PavGST38	Chr5	2	225	25867.8	5.63
Pav_sc0000103.1_g260.1.mk	PavGST39	Chr5	1	115	13298.4	6.3
Pav_sc0000474.1_g230.1.mk	PavGST40	Chr5	2	217	24350.1	6.16
Pav_sc0000599.1_g130.1.mk	PavGST41	Chr5	2	225	25844.1	9.65
Pav_sc0000877.1_g340.1.mk	PavGST42	Chr5	1	231	25963.1	5.79
Pav_sc0000877.1_g460.1.mk	PavGST43	Chr5	1	231	26100.2	6.02
Pav_sc0000877.1_g470.1.br	PavGST44	Chr5	1	141	15897.5	6.15
Pav_sc0000877.1_g540.1.br	PavGST45	Chr5	1	234	26475.8	5.66
Pav_sc0000877.1_g550.1.br	PavGST46	Chr5	1	253	28520	7.77
Pav_sc0000877.1_g580.1.br	PavGST47	Chr5	1	88	10298.9	6.83
Pav_sc0000877.1_g670.1.br	PavGST48	Chr5	1	232	26146.7	7.73
Pav_sc0000206.1_g560.1.br	PavGST49	Chr6	2	172	19883	6.96
Pav_sc0001339.1_g170.1.mk	PavGST50	Chr6	2	235	27347.2	5.61
Pav_sc0001794.1_g270.1.mk	PavGST51	Chr6	2	223	25493.5	5.77
Pav_sc0001794.1_g280.1.mk	PavGST52	Chr6	2	221	25515.4	5.5
Pav_sc0000110.1_g140.1.mk	PavGST53	Chr7	1	231	26145.1	5.86
Pav_sc0000164.1_g180.1.br	PavGST54	Chr8	1	108	12781.9	6.73
Pav_sc0000164.1_g190.1.br	PavGST55	Chr8	1	222	25948.9	5.89
Pav_sc0000164.1_g200.1.br	PavGST56	Chr8	2	222	25617.5	5.71
Pav_sc0000164.1_g210.1.mk	PavGST57	Chr8	2	222	25924.9	5.93
Pav_sc0000164.1_g220.1.mk	PavGST58	Chr8	2	224	25478.3	5.71
Pav_sc0000164.1_g230.1.mk	PavGST59	Chr8	2	221	25435.2	6.62
Pav_sc0000848.1_g720.1.mk	PavGST60	Chr8	4	453	51136.9	6.12
Pav_sc0001126.1_g250.1.br	PavGST61	Chr8	2	527	59313.6	7.14
Pav_sc0001932.1_g020.1.br	PavGST62	Chr8	2	216	24862.4	5.7
Pav_co4009309.1_g010.1.br	PavGST63	Chr0	1	61	6939.07	8.12
Pav_sc0007176.1_g020.1.br	PavGST64	Chr0	1	231	26134	5.86
Pav_sc0008627.1_g010.1.mk	PavGST65	Chr0	1	222	25996	6.01
Pav_sc0011895.1_g010.1.br	PavGST66	Chr0	1	222	25935	6.13
Pav_sc0011895.1_g020.1.mk	PavGST67	Chr0	2	222	25588.5	6.14
