# Supplementary material for: Identification and Comprehensive Genome-Wide Analysis of Glutathione S-Transferase Gene Family in Sweet Cherry (Prunus avium) and Their Expression Profiling Reveals a Likely Role in Anthocyanin Accumulation
Source: Front Plant Sci. 2022 Jul 12;13:938800. doi: 10.3389/fpls.2022.938800 (PMC9315441; doi:10.3389/fpls.2022.938800)
Supplement: Supplementary file 2 [file Table_2.XLSX]

## Sheet: Sheet1
Table. S2 Cis- regulatory elements of GST gene family in Prunus avium
Gene ID	CGTCA-motif	LTR	GARE-motif	ABRE	MBS	Box 4	TGACG-motif	G-Box	O2-site	circadian	CAAT-box
Pav_sc0000085.1_g320.1.mk				7				3		1	8
Pav_sc0000119.1_g430.1.mk			1								9
Pav_sc0000207.1_g700.1.br									1		12
Pav_sc0000207.1_g720.1.mk					1				1		6
Pav_sc0000207.1_g840.1.mk	1			1			1				10
Pav_sc0000207.1_g850.1.mk				1							11
Pav_sc0000207.1_g860.1.br		1		1							10
Pav_sc0000257.1_g600.1.mk		1									5
Pav_sc0000359.1_g580.1.br				1							8
Pav_sc0000745.1_g320.1.mk					1	1			1		9
Pav_sc0001196.1_g1310.1.mk			1	1				1	1		24
Pav_sc0001196.1_g2210.1.mk					1						12
Pav_sc0001275.1_g020.1.mk				1					1		10
Pav_sc0002136.1_g320.1.mk	2			2			2		1		25
Pav_sc0002584.1_g240.1.mk											10
Pav_sc0007796.1_g150.1.mk	1			1			1				3
Pav_sc0000554.1_g2030.1.mk	1			1			1		1	1	13
Pav_sc0000789.1_g340.1.mk				2	1			1			15
Pav_sc0001708.1_g040.1.mk											17
Pav_sc0001708.1_g050.1.br											15
Pav_sc0001708.1_g060.1.mk											18
Pav_sc0001708.1_g070.1.br									1		15
Pav_sc0002998.1_g130.1.mk	1				1		1				4
Pav_sc0000464.1_g360.1.mk	2						2				5
Pav_sc0001124.1_g450.1.mk	2			1			2				10
Pav_sc0001215.1_g320.1.mk											10
Pav_sc0000095.1_g650.1.mk				1							14
Pav_sc0000095.1_g700.1.br				2	1						5
Pav_sc0000095.1_g710.1.br			1	1							6
Pav_sc0000095.1_g720.1.br				1	2				1		7
Pav_sc0000095.1_g730.1.mk			1	1							5
Pav_sc0000095.1_g760.1.br				1							2
Pav_sc0000095.1_g770.1.mk				1	1						6
Pav_sc0000095.1_g790.1.mk		1		2							7
Pav_sc0000095.1_g800.1.mk				1							5
Pav_sc0000095.1_g850.1.br		1		2							6
Pav_sc0001990.1_g130.1.mk											12
Pav_sc0000103.1_g250.1.mk											9
Pav_sc0000103.1_g260.1.mk											7
Pav_sc0000474.1_g230.1.mk											8
Pav_sc0000599.1_g130.1.mk	1			2			1	1			10
Pav_sc0000877.1_g340.1.mk											18
Pav_sc0000877.1_g460.1.mk											15
Pav_sc0000877.1_g470.1.br					1						14
Pav_sc0000877.1_g540.1.br											12
Pav_sc0000877.1_g550.1.br											13
Pav_sc0000877.1_g580.1.br					1						3
Pav_sc0000877.1_g670.1.br					1						11
Pav_sc0000206.1_g560.1.br		1									3
Pav_sc0001339.1_g170.1.mk											6
Pav_sc0001794.1_g270.1.mk											24
Pav_sc0001794.1_g280.1.mk											9
Pav_sc0000110.1_g140.1.mk	1				1		1				4
Pav_sc0000164.1_g180.1.br				2					1		6
Pav_sc0000164.1_g190.1.br	1			2			1		1		9
Pav_sc0000164.1_g200.1.br										1	13
Pav_sc0000164.1_g210.1.mk	1			2			1				10
Pav_sc0000164.1_g220.1.mk	1						1				9
Pav_sc0000164.1_g230.1.mk		1		2							11
Pav_sc0000848.1_g720.1.mk		1		1					1		17
Pav_sc0001126.1_g250.1.br		1		2	1						17
Pav_sc0001932.1_g020.1.br				2	1						5
Pav_co4009309.1_g010.1.br				1							4
Pav_sc0007176.1_g020.1.br	1				1		1				4
Pav_sc0008627.1_g010.1.mk	1			2	1		1				9
Pav_sc0011895.1_g010.1.br	1						1		1		9
Pav_sc0011895.1_g020.1.mk				2	1						8
