# Supplementary material for: Identification and Comprehensive Genome-Wide Analysis of Glutathione S-Transferase Gene Family in Sweet Cherry (Prunus avium) and Their Expression Profiling Reveals a Likely Role in Anthocyanin Accumulation
Source: Front Plant Sci. 2022 Jul 12;13:938800. doi: 10.3389/fpls.2022.938800 (PMC9315441; doi:10.3389/fpls.2022.938800)
Supplement: Supplementary file 3 [file Table_3.XLSX]

## Sheet: dispersed
Table S3 Different Gene duplication events and ka/ks value of GST gene family in Prunus avium
Mode of Duplication	Location	Duplicate 1	Starting point	Ending point	Location	Duplicate 2	Starting point	Ending point	E-value	Ka	Ks	ka/ks
Dispersed	PAV_r1.0chr1	Pav_sc0000085.1_g320.1.mk	27831498	27835315	PAV_r1.0chr5	Pav_sc0000103.1_g710.1.mk	16287986	16291697	7.8e-110	0.273024	1.26565	0.215718
	PAV_r1.0chr1	Pav_sc0001275.1_g020.1.mk	35474107	35475804	PAV_r1.0chr1	Pav_sc0007796.1_g150.1.mk	27651471	27655393	8.4e-12	0.899729	1.65487	0.543686
	PAV_r1.0chr3	Pav_sc0001124.1_g450.1.mk	64806	66056	PAV_r1.0chr3	Pav_sc0001215.1_g320.1.mk	13443428	13448863	8.1e-63	0.383795	3.17055	0.12105
	PAV_r1.0chr3	Pav_sc0001124.1_g450.1.mk	64806	66056	PAV_r1.0chr1	Pav_sc0007796.1_g150.1.mk	27651471	27655393	8.7e-57	-2	-2	1
	PAV_r1.0chr3	Pav_sc0001215.1_g320.1.mk	13443428	13448863	PAV_r1.0chr1	Pav_sc0007796.1_g150.1.mk	27651471	27655393	4.2e-49	0.510279	2.14017	0.238429
	PAV_r1.0chr5	Pav_sc0000474.1_g230.1.mk	1428704	1430267	PAV_r1.0chr8	Pav_sc0000848.1_g720.1.mk	20052135	20056048	5.1e-89	0.224531	0.488615	0.459526
	PAV_r1.0chr5	Pav_sc0000474.1_g230.1.mk	1428704	1430267	PAV_r1.0chr3	Pav_sc0001124.1_g450.1.mk	64806	66056	5e-52	-2	-2	1
	PAV_r1.0chr5	Pav_sc0000474.1_g230.1.mk	1428704	1430267	PAV_r1.0chr3	Pav_sc0001215.1_g320.1.mk	13443428	13448863	5.1e-49	0.507684	1.95012	0.260335
	PAV_r1.0chr8	Pav_sc0000848.1_g720.1.mk	20052135	20056048	PAV_r1.0chr3	Pav_sc0001124.1_g450.1.mk	64806	66056	1.9e-45	0.766932	0.773598	0.991383
	PAV_r1.0chr8	Pav_sc0000848.1_g720.1.mk	20052135	20056048	PAV_r1.0chr3	Pav_sc0001215.1_g320.1.mk	13443428	13448863	2.6e-47	0.786874	0.70042	1.12343
	PAV_r1.0chr8	Pav_sc0000848.1_g720.1.mk	20052135	20056048	PAV_r1.0chr1	Pav_sc0007796.1_g150.1.mk	27651471	27655393	8.2e-49	0.753212	0.858155	0.877712
Proximal	PAV_r1.0chr4	Pav_sc0000095.1_g650.1.mk	10788180	10789362	PAV_r1.0chr4	Pav_sc0000095.1_g700.1.br	10803882	10804731	1.4e-94	0.130409	0.454529	0.28691
	PAV_r1.0chr4	Pav_sc0000095.1_g700.1.br	10803882	10804731	PAV_r1.0chr4	Pav_sc0000095.1_g720.1.br	10808463	10809425	6.4e-100	0.047242	0.178739	0.264308
	PAV_r1.0chr4	Pav_sc0000095.1_g710.1.br	10805091	10806406	PAV_r1.0chr4	Pav_sc0000095.1_g730.1.mk	10809631	10810770	2e-117	0.0296432	0.104192	0.284506
	PAV_r1.0chr4	Pav_sc0000095.1_g730.1.mk	10809631	10810770	PAV_r1.0chr4	Pav_sc0000095.1_g760.1.br	10836297	10836686	1.5e-24	0.516787	0.498115	1.03749
	PAV_r1.0chr4	Pav_sc0000095.1_g760.1.br	10836297	10836686	PAV_r1.0chr4	Pav_sc0000095.1_g790.1.mk	10844729	10877338	2.2e-23	0.540966	0.436859	1.23831
	PAV_r1.0chr4	Pav_sc0000095.1_g770.1.mk	10838648	10840379	PAV_r1.0chr4	Pav_sc0000095.1_g800.1.mk	10858510	10859464	1.7e-53	0.0150948	0.0358545	0.421003
	PAV_r1.0chr4	Pav_sc0000095.1_g790.1.mk	10844729	10877338	PAV_r1.0chr4	Pav_sc0000095.1_g850.1.br	10876167	10877191	4.2e-123	0.0177057	0.00704231	2.5142
	PAV_r1.0chr5	Pav_sc0000877.1_g340.1.mk	14058935	14060088	PAV_r1.0chr5	Pav_sc0000877.1_g460.1.mk	14085166	14086163	3.4e-115	0.0445292	0.0648352	0.686806
	PAV_r1.0chr5	Pav_sc0000877.1_g580.1.br	14133321	14133587	PAV_r1.0chr5	Pav_sc0000877.1_g670.1.br	14176670	14177451	9.7e-31	0.283404	0.434985	0.651525
Tandem	PAV_r1.0chr1	Pav_sc0000207.1_g840.1.mk	3705235	3706300	PAV_r1.0chr1	Pav_sc0000207.1_g850.1.mk	3708897	3710132	2.1e-98	0.130947	0.246982	0.53019
	PAV_r1.0chr1	Pav_sc0000207.1_g850.1.mk	3708897	3710132	PAV_r1.0chr1	Pav_sc0000207.1_g860.1.br	3713401	3714489	1.2e-109	0.0900285	0.261533	0.344234
	PAV_r1.0chr1	Pav_sc0000207.1_g860.1.br	3713401	3714489	PAV_r1.0chr1	Pav_sc0000207.1_g870.1.br	3717390	3717638	1.5e-33	0.146449	0.088664	1.65173
	PAV_r1.0chr2	Pav_sc0001708.1_g050.1.br	9760722	9761674	PAV_r1.0chr2	Pav_sc0001708.1_g040.1.mk	9760827	9766234	2e-120	0.0219066	0.0136834	1.60097
	PAV_r1.0chr2	Pav_sc0001708.1_g060.1.mk	9756845	9757818	PAV_r1.0chr2	Pav_sc0001708.1_g050.1.br	9760722	9761674	1e-95	0.0205889	0.0553976	0.371657
	PAV_r1.0chr2	Pav_sc0001708.1_g070.1.br	9751861	9752803	PAV_r1.0chr2	Pav_sc0001708.1_g060.1.mk	9756845	9757818	1.1e-91	0.0389445	0.134721	0.289076
	PAV_r1.0chr5	Pav_sc0000103.1_g250.1.mk	16049348	16050362	PAV_r1.0chr5	Pav_sc0000103.1_g260.1.mk	16051390	16051737	1.1e-26	0.494957	0.460865	1.07397
	PAV_r1.0chr5	Pav_sc0000877.1_g460.1.mk	14085166	14086163	PAV_r1.0chr5	Pav_sc0000877.1_g470.1.br	14093045	14093605	4.8e-56	0.165229	0.0931968	1.7729
	PAV_r1.0chr5	Pav_sc0000877.1_g540.1.br	14119099	14120118	PAV_r1.0chr5	Pav_sc0000877.1_g550.1.br	14121814	14123450	1.3e-66	0.356374	0.631254	0.564549
	PAV_r1.0chr6	Pav_sc0001794.1_g280.1.mk	18385148	18386115	PAV_r1.0chr6	Pav_sc0001794.1_g270.1.mk	18387715	18388771	4e-81	0.176944	0.379602	0.466131
Transposed	PAV_r1.0chr1	Pav_sc0000359.1_g580.1.br	4674852	4675935	PAV_r1.0chr1	Pav_sc0000207.1_g840.1.mk	3705235	3706300	3.3e-43	0.216514	0.193041	1.1216
	PAV_r1.0chr4	Pav_sc0001990.1_g130.1.mk	18583965	18585698	PAV_r1.0chr1	Pav_sc0002584.1_g240.1.mk	21306057	21314107	3.9e-47	0.176701	0.317907	0.555827
	PAV_r1.0chr7	Pav_sc0000110.1_g140.1.mk	3978010	3981610	PAV_r1.0chr2	Pav_sc0002998.1_g130.1.mk	13696350	13700172	5.9e-112	0.0075878	0.0441768	0.17176
	PAV_r1.0chr8	Pav_sc0001932.1_g020.1.br	19073384	19074233	PAV_r1.0chr4	Pav_sc0000095.1_g650.1.mk	10788180	10789362	8.1e-95	0.130409	0.454529	0.28691
WGD	PAV_r1.0chr1	Pav_sc0000207.1_g700.1.br	3638971	3641152	PAV_r1.0chr8	Pav_sc0000164.1_g200.1.br	17242434	17243442	2.5e-70	0.317134	1.28468	0.246858
	PAV_r1.0chr1	Pav_sc0000207.1_g720.1.mk	3651900	3655328	PAV_r1.0chr8	Pav_sc0000164.1_g210.1.mk	17236252	17246714	4.4e-75	0.309174	1.32867	0.232695
	PAV_r1.0chr2	Pav_sc0000789.1_g340.1.mk	19284595	19287681	PAV_r1.0chr6	Pav_sc0001339.1_g170.1.mk	17137646	17140080	6.3e-93	0.22602	0.913816	0.247337
