# Supplementary material for: Identification and Comprehensive Genome-Wide Analysis of Glutathione S-Transferase Gene Family in Sweet Cherry (Prunus avium) and Their Expression Profiling Reveals a Likely Role in Anthocyanin Accumulation
Source: Front Plant Sci. 2022 Jul 12;13:938800. doi: 10.3389/fpls.2022.938800 (PMC9315441; doi:10.3389/fpls.2022.938800)
Supplement: Supplementary file 4 [file Table_4.XLSX]

## Sheet: Sheet1
	TableS4 List of GST orthologous gene pairs identified in sweet cherry among pear, strawberry, peach, apricot
			Stweet Cherry vs Pear						Stweet Cherry vs Straw berry								Stweet Cherry vs Peach								Stweet Cherry vs Japanese apricot
	Location	Gene name		Location	Orthologous pairs				Location	Gene name		Location	Orthologous pairs				Location	Gene name		Location	Orthologous pairs				Location	Gene name		Location	Orthologous pairs
	PAV_r1.0chr1	Pav_sc0001275.1_g020.1.mk	==	Chr10	Pbr021484.1				PAV_r1.0chr1	Pav_sc0000085.1_g320.1.mk	==	Fvb2	FvH4_2g38150.1				PAV_r1.0chr1	Pav_sc0002584.1_g240.1.mk	==	scaffold_1	ppa010869m				PAV_r1.0chr1	Pav_sc0007796.1_g150.1.mk	==	Pa2	Pm006139
	PAV_r1.0chr1	Pav_sc0002584.1_g240.1.mk	==	Chr13	Pbr039158.1				PAV_r1.0chr1	Pav_sc0001275.1_g020.1.mk	==	Fvb2	FvH4_2g27900.1				PAV_r1.0chr1	Pav_sc0007796.1_g150.1.mk	==	scaffold_1	ppa011153m				PAV_r1.0chr1	Pav_sc0000085.1_g320.1.mk	==	Pa2	Pm006177
	PAV_r1.0chr1	Pav_sc0007796.1_g150.1.mk	==	Chr15	Pbr005782.2				PAV_r1.0chr1	Pav_sc0000207.1_g720.1.mk	==	Fvb2	FvH4_2g20060.1				PAV_r1.0chr1	Pav_sc0000085.1_g320.1.mk	==	scaffold_1	ppa008706m				PAV_r1.0chr1	Pav_sc0002136.1_g320.1.mk	==	Pa2	Pm004221
	PAV_r1.0chr1	Pav_sc0000085.1_g320.1.mk	==	Chr15	Pbr005811.1				PAV_r1.0chr1	Pav_sc0000207.1_g700.1.br	==	Fvb2	FvH4_2g20070.1				PAV_r1.0chr1	Pav_sc0000119.1_g430.1.mk	==	scaffold_1	ppa011087m				PAV_r1.0chr1	Pav_sc0001275.1_g020.1.mk	==	Pa2	Pm004716
	PAV_r1.0chr1	Pav_sc0001275.1_g020.1.mk	==	Chr15	Pbr027927.1				PAV_r1.0chr1	Pav_sc0002584.1_g240.1.mk	==	Fvb4	FvH4_4g35560.1				PAV_r1.0chr1	Pav_sc0001275.1_g020.1.mk	==	scaffold_1	ppa010018m				PAV_r1.0chr1	Pav_sc0000207.1_g700.1.br	==	Pa2	Pm009086
	PAV_r1.0chr1	Pav_sc0002136.1_g320.1.mk	==	Chr15	Pbr000825.1				PAV_r1.0chr1	Pav_sc0000207.1_g700.1.br	==	Fvb4	FvH4_4g05340.1				PAV_r1.0chr1	Pav_sc0002136.1_g320.1.mk	==	scaffold_1	ppa006233m				PAV_r1.0chr1	Pav_sc0000207.1_g840.1.mk	==	Pa2	Pm009095
	PAV_r1.0chr1	Pav_sc0000257.1_g600.1.mk	==	Chr15	Pbr040677.1				PAV_r1.0chr1	Pav_sc0000207.1_g860.1.br	==	Fvb4	FvH4_4g05350.1				PAV_r1.0chr1	Pav_sc0000257.1_g600.1.mk	==	scaffold_1	ppa011108m				PAV_r1.0chr1	Pav_sc0000119.1_g430.1.mk	==	Pa2	Pm009356
	PAV_r1.0chr1	Pav_sc0000207.1_g700.1.br	==	Chr16	Pbr006038.1				PAV_r1.0chr1	Pav_sc0000745.1_g320.1.mk	==	Fvb4	FvH4_4g11790.1				PAV_r1.0chr1	Pav_sc0000207.1_g700.1.br	==	scaffold_1	ppa012928m				PAV_r1.0chr1	Pav_sc0000745.1_g320.1.mk	==	Pa2	Pm007637
	PAV_r1.0chr1	Pav_sc0000207.1_g700.1.br	==	Chr5	Pbr032948.3				PAV_r1.0chr1	Pav_sc0002136.1_g320.1.mk	==	Fvb5	FvH4_5g32590.1				PAV_r1.0chr1	Pav_sc0000207.1_g840.1.mk	==	scaffold_1	ppa017218m				PAV_r1.0chr1	Pav_sc0002584.1_g240.1.mk	==	Pa2	Pm006599
	PAV_r1.0chr1	Pav_sc0000207.1_g720.1.mk	==	Chr5	Pbr032952.1				PAV_r1.0chr1	Pav_sc0000257.1_g600.1.mk	==	Fvb5	FvH4_5g36020.1				PAV_r1.0chr1	Pav_sc0000745.1_g320.1.mk	==	scaffold_1	ppa022301m				PAV_r1.0chr1	Pav_sc0000207.1_g700.1.br	==	Pa6	Pm020444
	PAV_r1.0chr2	Pav_sc0000789.1_g340.1.mk	==	Chr12	Pbr008275.1				PAV_r1.0chr2	Pav_sc0000789.1_g340.1.mk	==	Fvb6	FvH4_6g14970.1				PAV_r1.0chr1	Pav_sc0000207.1_g720.1.mk	==	scaffold_8	ppa015182m				PAV_r1.0chr1	Pav_sc0000207.1_g720.1.mk	==	Pa6	Pm020443
	PAV_r1.0chr2	Pav_sc0002998.1_g130.1.mk	==	Chr2	Pbr042247.1				PAV_r1.0chr2	Pav_sc0000789.1_g340.1.mk	==	Fvb7	FvH4_7g20610.1				PAV_r1.0chr1	Pav_sc0000207.1_g840.1.mk	==	scaffold_8	ppa011142m				PAV_r1.0chr2	Pav_sc0000789.1_g340.1.mk	==	Pa5	Pm018622
	PAV_r1.0chr2	Pav_sc0001708.1_g070.1.br	==	Chr5	Pbr025554.1				PAV_r1.0chr2	Pav_sc0002998.1_g130.1.mk	==	Fvb7	FvH4_7g11880.1				PAV_r1.0chr2	Pav_sc0000789.1_g340.1.mk	==	scaffold_2	ppa009087m				PAV_r1.0chr2	Pav_sc0002998.1_g130.1.mk	==	Pa5	Pm017915
	PAV_r1.0chr2	Pav_sc0000789.1_g340.1.mk	==	Chr7	Pbr032270.1				PAV_r1.0chr2	Pav_sc0001708.1_g070.1.br	==	Fvb7	FvH4_7g07360.1				PAV_r1.0chr2	Pav_sc0002998.1_g130.1.mk	==	scaffold_2	ppa012648m				PAV_r1.0chr2	Pav_sc0001708.1_g070.1.br	==	Pa5	Pm017335
	PAV_r1.0chr2	Pav_sc0001708.1_g070.1.br	==	Chr7	Pbr040738.1				PAV_r1.0chr3	Pav_sc0001124.1_g450.1.mk	==	Fvb1	FvH4_1g27460.1				PAV_r1.0chr2	Pav_sc0001708.1_g070.1.br	==	scaffold_2	ppa016653m				PAV_r1.0chr3	Pav_sc0001124.1_g450.1.mk	==	Pa4	Pm012985
	PAV_r1.0chr3	Pav_sc0001124.1_g450.1.mk	==	Chr17	Pbr012649.1				PAV_r1.0chr3	Pav_sc0001215.1_g320.1.mk	==	Fvb6	FvH4_6g38760.1				PAV_r1.0chr2	Pav_sc0000789.1_g340.1.mk	==	scaffold_6	ppa010816m				PAV_r1.0chr3	Pav_sc0001215.1_g320.1.mk	==	Pa4	Pm014765
	PAV_r1.0chr3	Pav_sc0001215.1_g320.1.mk	==	Chr17	Pbr002369.1				PAV_r1.0chr4	Pav_sc0000095.1_g650.1.mk	==	Fvb3	FvH4_3g16210.1				PAV_r1.0chr3	Pav_sc0000464.1_g360.1.mk	==	scaffold_3	ppa010038m				PAV_r1.0chr3	Pav_sc0000464.1_g360.1.mk	==	Pa4	Pm014330
	PAV_r1.0chr3	Pav_sc0000464.1_g360.1.mk	==	Chr17	Pbr024548.1				PAV_r1.0chr4	Pav_sc0000095.1_g700.1.br	==	Fvb3	FvH4_3g16360.1				PAV_r1.0chr3	Pav_sc0001215.1_g320.1.mk	==	scaffold_3	ppa011246m				PAV_r1.0chr4	Pav_sc0000095.1_g720.1.br	==	Pa3	Pm011193
	PAV_r1.0chr3	Pav_sc0001215.1_g320.1.mk	==	Chr9	Pbr029620.1				PAV_r1.0chr5	Pav_sc0000599.1_g130.1.mk	==	Fvb5	FvH4_5g02100.1				PAV_r1.0chr3	Pav_sc0001124.1_g450.1.mk	==	scaffold_3	ppa011307m				PAV_r1.0chr4	Pav_sc0000095.1_g760.1.br	==	Pa3	Pm011192
	PAV_r1.0chr3	Pav_sc0000464.1_g360.1.mk	==	Chr9	Pbr016672.1				PAV_r1.0chr5	Pav_sc0000103.1_g250.1.mk	==	Fvb5	FvH4_5g16920.1				PAV_r1.0chr4	Pav_sc0000095.1_g650.1.mk	==	scaffold_4	ppa020220m				PAV_r1.0chr5	Pav_sc0000877.1_g540.1.br	==	Pa2	Pm006505
	PAV_r1.0chr4	Pav_sc0000095.1_g700.1.br	==	Chr10	Pbr001490.1				PAV_r1.0chr5	Pav_sc0000877.1_g540.1.br	==	Fvb5	FvH4_5g15000.1				PAV_r1.0chr4	Pav_sc0000095.1_g760.1.br	==	scaffold_4	ppb009345m				PAV_r1.0chr5	Pav_sc0000474.1_g230.1.mk	==	Pa7	Pm022984
	PAV_r1.0chr4	Pav_sc0000095.1_g710.1.br	==	Chr5	Pbr025233.1				PAV_r1.0chr5	Pav_sc0000877.1_g340.1.mk	==	Fvb5	FvH4_5g15100.1				PAV_r1.0chr5	Pav_sc0000877.1_g540.1.br	==	scaffold_1	ppa025728m				PAV_r1.0chr5	Pav_sc0000103.1_g250.1.mk	==	Pa7	Pm025127
	PAV_r1.0chr5	Pav_sc0000103.1_g250.1.mk	==	Chr14	Pbr038887.1				PAV_r1.0chr5	Pav_sc0000474.1_g230.1.mk	==	Fvb5	FvH4_5g24660.1				PAV_r1.0chr5	Pav_sc0000599.1_g130.1.mk	==	scaffold_5	ppa010414m				PAV_r1.0chr5	Pav_sc0000877.1_g340.1.mk	==	Pa7	Pm024928
	PAV_r1.0chr5	Pav_sc0000877.1_g340.1.mk	==	Chr6	Pbr011452.1				PAV_r1.0chr6	Pav_sc0001794.1_g280.1.mk	==	Fvb6	FvH4_6g12680.1				PAV_r1.0chr5	Pav_sc0000877.1_g340.1.mk	==	scaffold_5	ppa019399m				PAV_r1.0chr5	Pav_sc0000877.1_g550.1.br	==	Pa7	Pm024918
	PAV_r1.0chr5	Pav_sc0000877.1_g540.1.br	==	Chr6	Pbr011444.1				PAV_r1.0chr6	Pav_sc0001339.1_g170.1.mk	==	Fvb6	FvH4_6g14970.1				PAV_r1.0chr5	Pav_sc0000877.1_g540.1.br	==	scaffold_5	ppa026659m				PAV_r1.0chr5	Pav_sc0000599.1_g130.1.mk	==	Pa7	Pm023831
	PAV_r1.0chr5	Pav_sc0000103.1_g250.1.mk	==	Chr6	Pbr020346.1				PAV_r1.0chr6	Pav_sc0001339.1_g170.1.mk	==	Fvb7	FvH4_7g20610.1				PAV_r1.0chr5	Pav_sc0000103.1_g250.1.mk	==	scaffold_5	ppa026181m				PAV_r1.0chr6	Pav_sc0001794.1_g280.1.mk	==	Pa1	Pm002597
	PAV_r1.0chr6	Pav_sc0001339.1_g170.1.mk	==	Chr12	Pbr008275.1				PAV_r1.0chr8	Pav_sc0000848.1_g720.1.mk	==	Fvb2	FvH4_2g25180.1				PAV_r1.0chr5	Pav_sc0000474.1_g230.1.mk	==	scaffold_5	ppa011249m				PAV_r1.0chr6	Pav_sc0000206.1_g560.1.br	==	Pa1	Pm000243
	PAV_r1.0chr6	Pav_sc0001794.1_g280.1.mk	==	Chr4	Pbr022629.1				PAV_r1.0chr8	Pav_sc0000164.1_g180.1.br	==	Fvb2	FvH4_2g20020.1				PAV_r1.0chr6	Pav_sc0001339.1_g170.1.mk	==	scaffold_2	ppa009087m				PAV_r1.0chr6	Pav_sc0001339.1_g170.1.mk	==	Pa5	Pm018622
	PAV_r1.0chr6	Pav_sc0001339.1_g170.1.mk	==	Chr7	Pbr032270.1				PAV_r1.0chr8	Pav_sc0000164.1_g210.1.mk	==	Fvb2	FvH4_2g20030.1				PAV_r1.0chr6	Pav_sc0001339.1_g170.1.mk	==	scaffold_6	ppa010816m				PAV_r1.0chr8	Pav_sc0000164.1_g210.1.mk	==	Pa2	Pm009087
	PAV_r1.0chr8	Pav_sc0000164.1_g200.1.br	==	Chr5	Pbr032952.1				PAV_r1.0chr8	Pav_sc0000164.1_g200.1.br	==	Fvb4	FvH4_4g05320.1				PAV_r1.0chr6	Pav_sc0001794.1_g280.1.mk	==	scaffold_6	ppa018112m				PAV_r1.0chr8	Pav_sc0000164.1_g200.1.br	==	Pa2	Pm009086
									PAV_r1.0chr8	Pav_sc0000164.1_g210.1.mk	==	Fvb4	FvH4_4g05340.1				PAV_r1.0chr6	Pav_sc0000206.1_g560.1.br	==	scaffold_6	ppa011242m				PAV_r1.0chr8	Pav_sc0000848.1_g720.1.mk	==	Pa6	Pm019987
																	PAV_r1.0chr8	Pav_sc0000164.1_g210.1.mk	==	scaffold_1	ppa023716m				PAV_r1.0chr8	Pav_sc0000164.1_g180.1.br	==	Pa6	Pm020443
																	PAV_r1.0chr8	Pav_sc0000164.1_g190.1.br	==	scaffold_1	ppa012928m				PAV_r1.0chr8	Pav_sc0000164.1_g190.1.br	==	Pa6	Pm020444
																	PAV_r1.0chr8	Pav_sc0001126.1_g250.1.br	==	scaffold_8	ppa004972m
																	PAV_r1.0chr8	Pav_sc0000848.1_g720.1.mk	==	scaffold_8	ppa017385m
																	PAV_r1.0chr8	Pav_sc0000164.1_g180.1.br	==	scaffold_8	ppa011142m
																	PAV_r1.0chr8	Pav_sc0000164.1_g190.1.br	==	scaffold_8	ppa014958m
