# Supplementary material for: Identification and Comprehensive Genome-Wide Analysis of Glutathione S-Transferase Gene Family in Sweet Cherry (Prunus avium) and Their Expression Profiling Reveals a Likely Role in Anthocyanin Accumulation
Source: Front Plant Sci. 2022 Jul 12;13:938800. doi: 10.3389/fpls.2022.938800 (PMC9315441; doi:10.3389/fpls.2022.938800)
Supplement: Supplementary file 5 [file Table_5.XLSX]

## Sheet: Functions
Table S5 Go annotation; molecular process, biological process, Cellular components, and subcellular localization of GST gene family in Prunus avium
//
SN 1;
SD PavGST63;
SQ LLLQMNPVHKKIPVLIHNGKPVCESTNIVQYIDEAWKDKAPLLPSDPYQRAQARFDVSVNV;
CP Extracellular;
CP Mitochondrial;
MF transferase activity, transferring alkyl or aryl (other than methyl) groups;
MF ion binding;
MF isomerase activity;
BP catabolic process;
BP secondary metabolic process;
BP signal transduction;
BP response to stress;
BP cellular amino acid metabolic process;
BP sulfur compound metabolic process;
BP cellular nitrogen compound metabolic process;
BP small molecule metabolic process;
BP anatomical structure development;
CC intracellular;
CC cell;
CC cytoplasm;
CC cytosol;
CC plastid;
CC organelle;
CC plasma membrane;
//
SN 2;
SD PavGST1;
SQ MRRVNGVALLSRAVVCMGSSTAVGGATQQRLVQAAMLNTCSISNPLWFTRRLGDHFGLSKPSVSCGAGGHVCFSSNATSLAQEVHAQDKFLPKDVELYQYEACPFCNKVRAFLDYYKIPYKVMEVNPISKKEIKWSDYKKVPILKVDGEQMVDSSDIIDKLFQRINPENNVVNGEEEKKWRGWVDNHLVHVLSPNIYRTASEALESFDYITSHGNFSLYERIVAKYTGAAAMYFVSKKLKKKHNITDERAALYEAAETWVDALKGRQFLGGSNPNLADLAAFGVLRPIRHLKSGKDMVENTRIGEWYTRMESSVGESARIEA;
CP Mitochondrial;
CP Chloroplast;
MF oxidoreductase activity;
MF isomerase activity;
MF DNA binding;
BP lipid metabolic process;
BP biosynthetic process;
BP homeostatic process;
BP small molecule metabolic process;
BP transport;
CC intracellular;
CC cell;
CC nucleus;
CC cytoplasm;
CC mitochondrion;
CC Golgi apparatus;
CC cytosol;
CC organelle;
//
SN 3;
SD PavGST27;
SQ MADEVVLLDFWPSMFGMRVRVALAEKGVKYEYREEDLPNKSPLLLQMNPVHKKIPVLIHNGKPVCESTNIVQYIDEAWKDKAPLLPSDPYQRAQARFWVDYIDKNLYEAGRKIWATKGEEQEAAKKKLIEILKLLEGQLGDNTYFGGEIFGFLDVALVTFYCWFFSYETCGNFSIEAECPKLIEWAKRCMQKESVAKSLPDPKKVYEFTLLLKKIFGAE;
CP Cytoplasmic;
MF transferase activity, transferring alkyl or aryl (other than methyl) groups;
MF oxidoreductase activity;
MF ion binding;
MF isomerase activity;
BP signal transduction;
BP response to stress;
BP catabolic process;
BP secondary metabolic process;
BP cellular amino acid metabolic process;
BP sulfur compound metabolic process;
BP cellular nitrogen compound metabolic process;
BP small molecule metabolic process;
BP anatomical structure development;
BP biosynthetic process;
BP carbohydrate metabolic process;
BP protein targeting;
BP transport;
BP mitochondrion organization;
CC intracellular;
CC cell;
CC cytoplasm;
CC cytosol;
CC plasma membrane;
CC plastid;
CC organelle;
CC mitochondrion;
//
SN 4;
SD PavGST28;
SQ MADEEVVVLGFWTSTYGTRATIALDEKGVKYEYREEDLSNKSSLLLQMNPVHKKIPVLIHNGKPVCESLIIVQYVDEVWRDKAPLLPSDPYQRARARFWADFIDKKVFDAGKKLWSTKGEEHEAAKKEFIEILTQLEGELGDKPYFGGERFGFLDVALITFYSWFYAFETFGNFSTEAECPKLIEWAKRCTHRESVSKSLADPKKVYEFLLGRIAG;
CP Cytoplasmic;
MF transferase activity, transferring alkyl or aryl (other than methyl) groups;
MF oxidoreductase activity;
MF ion binding;
MF isomerase activity;
BP signal transduction;
BP response to stress;
BP catabolic process;
BP secondary metabolic process;
BP cellular amino acid metabolic process;
BP sulfur compound metabolic process;
BP cellular nitrogen compound metabolic process;
BP small molecule metabolic process;
BP anatomical structure development;
BP biosynthetic process;
BP carbohydrate metabolic process;
BP cellular protein modification process;
BP translation;
CC intracellular;
CC cell;
CC cytoplasm;
CC cytosol;
CC plasma membrane;
CC plastid;
CC organelle;
//
SN 5;
SD PavGST29;
SQ MADEVLLLDFWPSPFGMRLRVALAEKGIQYEYKEEDLSNKSALLLQSNPVHKKIPVLIHNGKPVSESLVALEYIDEVWKDKAPLLPSDPYPRAQARFWADFVDKKMYDIGRRVVWTTKGEEQEAAKKEFLECIGLLEGELGDKPYFGGETLGFVDVALIPFYSWFYVYEKCGNFSIEAEQPKFYAWAKRCMQKESVSKSLADQKAIYDLFLQRMKARGIDQ;
CP Cytoplasmic;
MF transferase activity, transferring alkyl or aryl (other than methyl) groups;
MF oxidoreductase activity;
MF ion binding;
MF isomerase activity;
BP signal transduction;
BP response to stress;
BP catabolic process;
BP secondary metabolic process;
BP cellular amino acid metabolic process;
BP sulfur compound metabolic process;
BP cellular nitrogen compound metabolic process;
BP small molecule metabolic process;
BP anatomical structure development;
BP biosynthetic process;
BP carbohydrate metabolic process;
BP cellular protein modification process;
CC intracellular;
CC cell;
CC cytoplasm;
CC cytosol;
CC plastid;
CC organelle;
//
SN 6;
SD PavGST30;
SQ MADDEVVVLGFWPSMYGTRATIALDEKGVKYEYREEDLRNKSSLLLQMNPVQKKIPVLIHNGKPVCESLIIVQYIDEVWEGKAPLLPSDPYQRARARVWADFIDKKEAKKEFIDILKQLEGELGDKPYFGGESFGFLDIALITSYNWFYAFETLGNFSTEAECPKLIEWAKRCMQRESVSKSLADPKKVYEFLLGWIAG;
CP Cytoplasmic;
CP Chloroplast;
MF transferase activity, transferring alkyl or aryl (other than methyl) groups;
MF oxidoreductase activity;
MF ion binding;
MF isomerase activity;
BP signal transduction;
BP response to stress;
BP catabolic process;
BP secondary metabolic process;
BP cellular amino acid metabolic process;
BP sulfur compound metabolic process;
BP cellular nitrogen compound metabolic process;
BP small molecule metabolic process;
BP anatomical structure development;
BP biosynthetic process;
BP carbohydrate metabolic process;
BP cellular protein modification process;
CC intracellular;
CC cell;
CC cytoplasm;
CC cytosol;
CC plasma membrane;
CC plastid;
CC organelle;
//
SN 7;
SD PavGST31;
SQ MADEVLLLDFWSSPYGMRLRVALAEKGIQYEYKEEDLSNKSALLLQSNPVHKKIPVLIHNGKPVSESLVALQYIDEVWKDKTPLLPSDPYLRAQARFWADFVDKKVSEIGRVIRTTKGEEQEAAKKEFLQIIGLLEGELGDKPYFGGETLGFVDVALIPFYSWFYVYEKCGNFSIEAEQPKFSAWAKRCMQKESVSKSLADQKAIYDLFLQRMKARGMDQ;
CP Cytoplasmic;
MF transferase activity, transferring alkyl or aryl (other than methyl) groups;
MF oxidoreductase activity;
MF ion binding;
MF isomerase activity;
BP signal transduction;
BP response to stress;
BP catabolic process;
BP secondary metabolic process;
BP cellular amino acid metabolic process;
BP sulfur compound metabolic process;
BP cellular nitrogen compound metabolic process;
BP small molecule metabolic process;
BP anatomical structure development;
BP biosynthetic process;
BP carbohydrate metabolic process;
BP cellular protein modification process;
CC intracellular;
CC cell;
CC cytoplasm;
CC cytosol;
CC plastid;
CC organelle;
//
SN 8;
SD PavGST32;
SQ MQVYESGKRTRRTKGEEHEVANREFLECIRLLEEELGDKPYFGGENLGFVDVALIPTYSWFYVREKFGNFSVECHGPYVEGSTQQLWGQPRGSIYEGQAPQEKLKAQPVEWIMLDLLAHMSRFKVDSGW;
CP Cytoplasmic;
CP Nuclear;
MF transferase activity, transferring alkyl or aryl (other than methyl) groups;
MF oxidoreductase activity;
MF ion binding;
BP signal transduction;
BP catabolic process;
BP secondary metabolic process;
BP response to stress;
BP cellular amino acid metabolic process;
BP sulfur compound metabolic process;
BP cellular nitrogen compound metabolic process;
BP small molecule metabolic process;
CC intracellular;
CC cell;
CC cytoplasm;
CC cytosol;
CC plasma membrane;
CC plastid;
CC organelle;
CC extracellular region;
//
SN 9;
SD PavGST33;
SQ MADEVVLLDFRASMFAMRARVALAEKGVKYENREEDLRNKSSLLQQMNPVHKKIPVLIHNGKPVCESLIIVQYVDEVWRDKAPLLPSDPYQRARSRFWADFIDKKFYVASRKLWGTQGEEQEAGKKEFIEALKQLEGELGDEPYFEGESFGFLDIALIPFYSWFYAYETYGNFSTEAECPKLIEWARRCMHRESVSKSLADPKKVYESLVNRV;
CP Cytoplasmic;
MF transferase activity, transferring alkyl or aryl (other than methyl) groups;
MF oxidoreductase activity;
MF ion binding;
MF isomerase activity;
BP signal transduction;
BP response to stress;
BP catabolic process;
BP secondary metabolic process;
BP cellular amino acid metabolic process;
BP sulfur compound metabolic process;
BP cellular nitrogen compound metabolic process;
BP small molecule metabolic process;
BP anatomical structure development;
BP biosynthetic process;
BP carbohydrate metabolic process;
BP cellular protein modification process;
CC intracellular;
CC cell;
CC cytoplasm;
CC cytosol;
CC plasma membrane;
CC plastid;
CC organelle;
//
SN 10;
SD PavGST34;
SQ MADQVVLLDFWPSPFGMRLRIALAEKGVQYEYKDEDLRNKSPLLLQSNPVHKKIPVLIHNGKAVSESLIAVQYIDEVWKDKAPLLPSDPHLRAHARFWADYVDKKMYEIGRKVWTTKGEEQDAAKKEFIECISVLEGELGDKPYFGGKTFGFLDVALIPFSSWFSVYEKFGNFSVEAEHPKFIAWVKRCLEKESVSKSIPDQQKVYEFVLEMRTKLGIE;
CP Cytoplasmic;
MF transferase activity, transferring alkyl or aryl (other than methyl) groups;
MF oxidoreductase activity;
MF ion binding;
MF isomerase activity;
BP signal transduction;
BP response to stress;
BP catabolic process;
BP secondary metabolic process;
BP cellular amino acid metabolic process;
BP sulfur compound metabolic process;
BP cellular nitrogen compound metabolic process;
BP small molecule metabolic process;
BP anatomical structure development;
BP biosynthetic process;
BP carbohydrate metabolic process;
BP cellular protein modification process;
CC intracellular;
CC cell;
CC cytoplasm;
CC cytosol;
CC plastid;
CC organelle;
//
SN 11;
SD PavGST35;
SQ KSKTFIYLLSLCQARQSLKKKKEACFVYQSTMADEVVLLDFWASMFAMRARVALAEKGVKYENREEDLRNKSSLLLQMNPVHKKIPVLIHNGKPVCESLIIVQYVDEVWRDKAPLLPSDPYQRARSRFWADFIDKN;
CP Extracellular;
CP Chloroplast;
MF transferase activity, transferring alkyl or aryl (other than methyl) groups;
MF ion binding;
MF oxidoreductase activity;
MF isomerase activity;
BP response to stress;
BP catabolic process;
BP secondary metabolic process;
BP signal transduction;
BP cellular amino acid metabolic process;
BP sulfur compound metabolic process;
BP cellular nitrogen compound metabolic process;
BP small molecule metabolic process;
BP anatomical structure development;
BP biosynthetic process;
BP carbohydrate metabolic process;
CC intracellular;
CC cell;
CC cytoplasm;
CC cytosol;
CC plasma membrane;
CC plastid;
CC organelle;
//
SN 12;
SD PavGST36;
SQ MADQVVLLGFWPSPFGMRLRIALAEKGVQYEYKDEDLRNKSPLLLQSNPVHKKIPVLIHNGKAVSESLIAVQYIDEVWKDKAPLLPSDPHLRAHARFWADYVDKKMPEIGRKVWTTKGEELDAAKKEFLECISVLEGELGDKPYFGGKTFGFVDVALIPFSSWLSVYEKFGNFSVEAEHPKFIAWVKRCLEKESVSKSIPDQQKVYDFVLEMRKKLGIE;
CP Cytoplasmic;
MF transferase activity, transferring alkyl or aryl (other than methyl) groups;
MF oxidoreductase activity;
MF ion binding;
MF isomerase activity;
BP signal transduction;
BP response to stress;
BP catabolic process;
BP secondary metabolic process;
BP cellular amino acid metabolic process;
BP sulfur compound metabolic process;
BP cellular nitrogen compound metabolic process;
BP small molecule metabolic process;
BP anatomical structure development;
BP biosynthetic process;
BP carbohydrate metabolic process;
BP cellular protein modification process;
CC intracellular;
CC cell;
CC cytoplasm;
CC cytosol;
CC plastid;
CC organelle;
//
SN 13;
SD PavGST38;
SQ MGGAKLVATTQSLFCTRIEWALKLKGVEYEYIEEDLRNKSPILLKYNPVHKKVPVFVHDDRAIAESLVILEYIDETWKEHPLLPQDSYDRAKARFWAKFADEKVVFGAWRACTAAEGEEKEKAIESALESLAYLEKQIEGKKFFGGEEIGYLDLALGWIPHWLNTMEEAGGMKLLEVERFPSLHEWGHNFIQIPLIKECLPPREKLVNYLNASLTYLRSLSANKP;
CP Cytoplasmic;
MF transferase activity, transferring alkyl or aryl (other than methyl) groups;
MF ion binding;
MF oxidoreductase activity;
MF isomerase activity;
BP response to stress;
BP catabolic process;
BP secondary metabolic process;
BP signal transduction;
BP cellular amino acid metabolic process;
BP sulfur compound metabolic process;
BP cellular nitrogen compound metabolic process;
BP small molecule metabolic process;
BP anatomical structure development;
BP biosynthetic process;
BP carbohydrate metabolic process;
CC intracellular;
CC cell;
CC cytoplasm;
CC cytosol;
CC plasma membrane;
CC plastid;
CC organelle;
//
SN 14;
SD PavGST39;
SQ MQCVISAWTASRTKGHEQEKALESAQESLQLLNKLIEGKKFFGGETMGFLDFVVGSLPNWLKFLEEFQGIKLFDTKELPFLHEWAQRFTEIPIIKESIPKIEDLLNYSRAQHKAK;
CP Cytoplasmic;
MF transferase activity, transferring alkyl or aryl (other than methyl) groups;
MF ion binding;
BP response to stress;
BP catabolic process;
BP secondary metabolic process;
BP signal transduction;
BP anatomical structure development;
BP cellular amino acid metabolic process;
BP sulfur compound metabolic process;
BP cellular nitrogen compound metabolic process;
BP small molecule metabolic process;
CC intracellular;
CC cell;
CC cytoplasm;
CC cytosol;
CC plastid;
CC organelle;
CC nucleus;
//
SN 15;
SD PavGST53;
SQ MEASSEQQKKSENSSSSSPSKLLLYSYWQSSCSWRVRFALSLKGLPYEYKPVNITKGEQFSPDFKRLNPLHFVPVLVDGDIVVSDSYAILLYLEDKYPQRPLLPADPRLKALNLQAASIINSNIQPLHMVSLLKHLEEKVGPEESLSFAQLIIEKGLLALEMLLKDFASRYATGDEVYMADVFLAPQIVVSTSRFNINMSKFPTLSRLYESYKILLELEASSPERQPDAVH;
MF transferase activity, transferring alkyl or aryl (other than methyl) groups;
MF oxidoreductase activity;
MF isomerase activity;
MF ion binding;
MF lyase activity;
BP cellular amino acid metabolic process;
BP small molecule metabolic process;
BP catabolic process;
BP secondary metabolic process;
BP response to stress;
BP sulfur compound metabolic process;
BP cellular nitrogen compound metabolic process;
BP signal transduction;
CC intracellular;
CC cell;
CC cytoplasm;
CC cytosol;
CC organelle;
CC plasma membrane;
CC nucleus;
CC extracellular region;
CC plastid;
//
SN 16;
SD PavGST2;
SQ MATEKVKLLGFVFSPFSRRVEWALKLKGIDYEYVEEDIFNKSPLLLQLNPVRKKIPVLVHGNKVVPESFTILEYIDETWKQNPLMPQDPYARAISRFWANFTEEKVLDGAFTALIFSTGEQQEKALKSTIEALEHIEGDLMGKKILGGESLGYLDIAMGWISYWLPIWEEVGSRQVLDPSKFPATISWMNKFLSHPLIKDNLPRRDKTVAYFHGRRNFFTSG;
CP Cytoplasmic;
CP Chloroplast;
MF transferase activity, transferring alkyl or aryl (other than methyl) groups;
MF ion binding;
MF oxidoreductase activity;
MF isomerase activity;
BP response to stress;
BP catabolic process;
BP secondary metabolic process;
BP signal transduction;
BP cellular amino acid metabolic process;
BP sulfur compound metabolic process;
BP cellular nitrogen compound metabolic process;
BP small molecule metabolic process;
BP anatomical structure development;
BP biosynthetic process;
BP carbohydrate metabolic process;
BP cellular protein modification process;
CC intracellular;
CC cell;
CC cytoplasm;
CC cytosol;
CC plastid;
CC organelle;
//
SN 17;
SD PavGST54;
SQ MEEVKVLGFWTSPYPYRVIWALRLKGVKYEYIEDDIYNKSDLLLRSNPVHKMVPVFFHGGKIIAESTVILEYIEETWPQNPLLPNDPYARAMARFWTKFGDDKVIKFP;
CP Cytoplasmic;
CP Mitochondrial;
CP Chloroplast;
MF transferase activity, transferring alkyl or aryl (other than methyl) groups;
MF ion binding;
MF oxidoreductase activity;
MF isomerase activity;
BP catabolic process;
BP secondary metabolic process;
BP signal transduction;
BP response to stress;
BP anatomical structure development;
BP cellular amino acid metabolic process;
BP sulfur compound metabolic process;
BP cellular nitrogen compound metabolic process;
BP small molecule metabolic process;
BP biosynthetic process;
BP carbohydrate metabolic process;
BP cellular protein modification process;
CC intracellular;
CC cell;
CC cytoplasm;
CC cytosol;
CC plastid;
CC organelle;
//
SN 18;
SD PavGST55;
SQ MEEVKVLGYWTSPYPYRVIWALKLKGVKYEYIEDDIYNKSDLLLRSNPVHKMVPVFFHGGKIIAESTVILEYIEETWPQNPLLPNDPYARAMARFWTKFGDDMRPNFFAFFWKTGDEQAKAVKDAQELMTIWEQQGLGEKKFFNGDEIGMTDLAFGWIAFWLEAMEEAAGVQVLEVNSFLRLQAWIKNFKEVPVIKENHPDKSRLLGYMKERRAVHVKPATS;
CP Cytoplasmic;
MF transferase activity, transferring alkyl or aryl (other than methyl) groups;
MF ion binding;
MF oxidoreductase activity;
MF isomerase activity;
BP signal transduction;
BP response to stress;
BP catabolic process;
BP secondary metabolic process;
BP cellular amino acid metabolic process;
BP sulfur compound metabolic process;
BP cellular nitrogen compound metabolic process;
BP small molecule metabolic process;
BP anatomical structure development;
BP biosynthetic process;
BP carbohydrate metabolic process;
BP cellular protein modification process;
CC intracellular;
CC cell;
CC cytoplasm;
CC cytosol;
CC plastid;
CC organelle;
//
SN 19;
SD PavGST56;
SQ MEEVKLLGAWPSLFCYRVIWALKLKGVKYEYVEENLMNKSDRLLQYNPVHKKIPVLVHGGKPISESTVILEYIEEVWPHNSLLSDDPYERAMARFWIKFGEDKTAIFIAYFQSVGEEHEKAKREAQEVLKTIEEHGLGEKKFFGGDTIGLADLTFGWIAGWLGEMEEAAGVKLLEPNLFPHLQTWIKNFRDVPVIKDNLPEHDGMLAYFKSLREKFTASART;
CP Cytoplasmic;
MF transferase activity, transferring alkyl or aryl (other than methyl) groups;
MF ion binding;
MF oxidoreductase activity;
MF isomerase activity;
BP signal transduction;
BP response to stress;
BP catabolic process;
BP secondary metabolic process;
BP anatomical structure development;
BP cellular amino acid metabolic process;
BP sulfur compound metabolic process;
BP cellular nitrogen compound metabolic process;
BP small molecule metabolic process;
BP biosynthetic process;
BP carbohydrate metabolic process;
BP cellular protein modification process;
CC intracellular;
CC cell;
CC cytoplasm;
CC cytosol;
CC plasma membrane;
CC plastid;
CC organelle;
//
SN 20;
SD PavGST57;
SQ MEEVKVLGFWTSPYPHRVIWALKLKGVKYEYIEEDIYNKSDLLLQSNPVHKKVPVFFHGGKIIAESTVILEYIEETWPQNPLLPNDPYARAMARFWTKFLDDKKPNVLGFFRKIGDEQAKAVKDAQEIMTILEQHSLGENKFFNGDEIGMTDLAFGLITFWLEVMEEAAGVQVLEVNRFPRLQAWIKNFKEVPVIKENHPDESRLLAYMKERREEHVKKATS;
CP Cytoplasmic;
MF transferase activity, transferring alkyl or aryl (other than methyl) groups;
MF ion binding;
MF oxidoreductase activity;
MF isomerase activity;
BP signal transduction;
BP catabolic process;
BP secondary metabolic process;
BP response to stress;
BP cellular amino acid metabolic process;
BP sulfur compound metabolic process;
BP cellular nitrogen compound metabolic process;
BP small molecule metabolic process;
BP anatomical structure development;
BP biosynthetic process;
BP carbohydrate metabolic process;
BP cellular protein modification process;
CC intracellular;
CC cell;
CC cytoplasm;
CC cytosol;
CC plasma membrane;
CC plastid;
CC organelle;
//
SN 21;
SD PavGST58;
SQ MAEVKLLGAWPSPYVNRVIWALKLKGVEYEHVEEDVLFNKSDQLLKYNPVHKKVPVLVHDGKPIAESIVILEYIEEAWPHNPLLPKDLHQRAEARFWAKFGEDKNRAFLGFFFVTGEEQVKAVKEAQESLGILEEHALGNKKFFGGDEIGLADLAFGWIAWWLEVLEEAAGVKVLEADSFPRLKAWMQSFKEFPTIKESLPDRSGMLTYYKGRRATHVASAADA;
CP Cytoplasmic;
MF transferase activity, transferring alkyl or aryl (other than methyl) groups;
MF ion binding;
MF oxidoreductase activity;
MF isomerase activity;
MF RNA binding;
MF translation factor activity, nucleic acid binding;
BP response to stress;
BP signal transduction;
BP catabolic process;
BP secondary metabolic process;
BP cellular amino acid metabolic process;
BP sulfur compound metabolic process;
BP cellular nitrogen compound metabolic process;
BP small molecule metabolic process;
BP anatomical structure development;
BP biosynthetic process;
BP carbohydrate metabolic process;
BP cellular protein modification process;
BP translation;
CC intracellular;
CC cell;
CC cytoplasm;
CC cytosol;
CC plasma membrane;
CC plastid;
CC organelle;
//
SN 22;
SD PavGST59;
SQ EEVKVLGFWASPYAYRVIWALKLKSVEYEYVEEDIFNKSDLLLHCNPVHKKVPVFFHGEKTIAESTVILEYIEETWPQNPLLPNDPYARAMARFWTKFGDDKRQNFFGFLKKTGDEQAKAAKEAQELLTIIEQHGLGEKKFFNGNKVGMTDLAFGWIAFSLEAMEEAAGVQVLEANSFPRLQAWIKNFKEVPVIKGNHPDKSRLLAYMKQLREVYAKPATS;
CP Cytoplasmic;
MF transferase activity, transferring alkyl or aryl (other than methyl) groups;
MF ion binding;
MF oxidoreductase activity;
MF isomerase activity;
BP response to stress;
BP catabolic process;
BP secondary metabolic process;
BP signal transduction;
BP cellular amino acid metabolic process;
BP sulfur compound metabolic process;
BP cellular nitrogen compound metabolic process;
BP small molecule metabolic process;
BP anatomical structure development;
BP biosynthetic process;
BP carbohydrate metabolic process;
BP cellular protein modification process;
CC intracellular;
CC cell;
CC cytoplasm;
CC cytosol;
CC plastid;
CC organelle;
//
SN 23;
SD PavGST49;
SQ MNPVHKMIPVLIHNGKPISESLILLQYIDEVWHHTSPLLPSDPYQRSQARFSADYIDKKIYSLGKRVWKEKGEKQEATKKEFLEGLRTIEGELGDKPYFGGEDFGFVDVVLVPLTSWFYSFEICGNFSIEAECPKLVAWARRCMERDSVSKSLPHPQKIYAFVLELKQKYGL;
CP Cytoplasmic;
MF transferase activity, transferring alkyl or aryl (other than methyl) groups;
MF oxidoreductase activity;
MF ion binding;
MF isomerase activity;
BP signal transduction;
BP response to stress;
BP catabolic process;
BP secondary metabolic process;
BP cellular amino acid metabolic process;
BP sulfur compound metabolic process;
BP cellular nitrogen compound metabolic process;
BP small molecule metabolic process;
BP anatomical structure development;
BP biosynthetic process;
BP cellular protein modification process;
BP carbohydrate metabolic process;
CC intracellular;
CC cell;
CC cytoplasm;
CC cytosol;
CC plasma membrane;
CC plastid;
CC organelle;
//
SN 24;
SD PavGST3;
SQ MEEEVKLIGFWPSPYVYRVIWALKLKGVKYEYIEEDVSNKSELLLQLNPIHKKVPVLVHRGKPIAESPVILEYIEETWPGNYLLLPQDAHERASARFWIQCYVYQAPIFGPFFELTAGEEREKTIKAVLENLKILEEQGLGDKKFFGGETISLVDITHGWLPHWFEAIEEMVGVKVLGASTLPRLHAWVQNFKQVPVIKDNLPDYQKLLAHMTCLRKSRVPDQV;
CP Cytoplasmic;
MF transferase activity, transferring alkyl or aryl (other than methyl) groups;
MF ion binding;
MF oxidoreductase activity;
MF isomerase activity;
BP response to stress;
BP catabolic process;
BP secondary metabolic process;
BP signal transduction;
BP anatomical structure development;
BP cellular amino acid metabolic process;
BP sulfur compound metabolic process;
BP cellular nitrogen compound metabolic process;
BP small molecule metabolic process;
BP biosynthetic process;
BP carbohydrate metabolic process;
BP cellular protein modification process;
CC intracellular;
CC cell;
CC cytoplasm;
CC cytosol;
CC plasma membrane;
CC plastid;
CC organelle;
CC nucleus;
//
SN 25;
SD PavGST4;
SQ MAEVKLLGFWPSFFVHRVIWALKLKGVSYEYIEEDLSNKSQLLLQSNPVYKKVPVLVHGGKTIAESLIILEYIEETWPEKPLLPKDPHEKALARFWIQFGVEKIPPRLSAYFRAVGDEEQEKATKELHEALKILEEQGLGDKIFFGGDTIGLVDIALGALSYWFECVEEAVGKKVIEPGTLPRLHAWAQNFKQVPVIKENLPDHGRLLDYQKHKREKFVLAKSTAQ;
CP Cytoplasmic;
MF transferase activity, transferring alkyl or aryl (other than methyl) groups;
MF ion binding;
MF oxidoreductase activity;
MF isomerase activity;
BP signal transduction;
BP response to stress;
BP catabolic process;
BP secondary metabolic process;
BP cellular amino acid metabolic process;
BP sulfur compound metabolic process;
BP cellular nitrogen compound metabolic process;
BP small molecule metabolic process;
BP anatomical structure development;
BP biosynthetic process;
BP carbohydrate metabolic process;
BP cellular protein modification process;
CC intracellular;
CC cell;
CC cytoplasm;
CC cytosol;
CC plastid;
CC organelle;
//
SN 26;
SD PavGST5;
SQ MAEVIKLHGVWASAFSCRVIWALKLKGIPYDCIEEDLRNKSPELLKYNPVHKKIPVLVHGEKPICESMIIVEYIEETWPEKPLLPADPYDRAIARFWVKFADDKGPALWMLFRTTGEELEKFKKESLEMLKTIEEHAGTLGKKKFFGGDNIGIVDIAFGGIAHWFGVMEDVVGVKLFEAQVFPCLHAWTENFKQVPAIKESLPDHDKLVVLYKQMREFLLASS;
CP Cytoplasmic;
MF transferase activity, transferring alkyl or aryl (other than methyl) groups;
MF oxidoreductase activity;
MF ion binding;
MF isomerase activity;
BP response to stress;
BP signal transduction;
BP catabolic process;
BP secondary metabolic process;
BP cellular amino acid metabolic process;
BP sulfur compound metabolic process;
BP cellular nitrogen compound metabolic process;
BP small molecule metabolic process;
BP biosynthetic process;
BP carbohydrate metabolic process;
BP cellular protein modification process;
CC intracellular;
CC cell;
CC cytoplasm;
CC cytosol;
CC plastid;
CC organelle;
//
SN 27;
SD PavGST6;
SQ MAEVKLHGVWNSPFSCRVIWALKLKGIPYDYIEEDLPNKKSPELLKYNPVHKKIPVLVQGGRPICESMIIVEYIEETWPHKYPFLPTDPYERAMARFWIKYFEEKGPAIWMVSQTTGDEQVKFKKESLEILRTIDDHAGTLGKKKFFGGDNIGMLDIALGCIAHWTEVIEDVAGVKLFEAHAFPYLHAWTQNFKEVPAIKENLPDRDKMLILFKRGREKLLASQ;
CP Cytoplasmic;
MF transferase activity, transferring alkyl or aryl (other than methyl) groups;
MF ion binding;
MF oxidoreductase activity;
MF isomerase activity;
MF lyase activity;
BP response to stress;
BP catabolic process;
BP secondary metabolic process;
BP signal transduction;
BP cellular amino acid metabolic process;
BP sulfur compound metabolic process;
BP cellular nitrogen compound metabolic process;
BP small molecule metabolic process;
BP biosynthetic process;
BP carbohydrate metabolic process;
BP cellular protein modification process;
CC intracellular;
CC cell;
CC cytoplasm;
CC cytosol;
CC plastid;
CC organelle;
//
SN 28;
SD PavGST7;
SQ MADELKLLGVWNSPFSCRVIWALKLKGIPYDYIEEDLQNKSPELLKYNPVHKKVPVLVHGERPICESLIIVEYIEETWPQKYPLLPIDPYERAMARFWVKYFEEKSIAIWMVFRTTGEEQEKFKKESLEMLRTIEEHAGTLGKRKFFGGDEIGIVDIAFGWIAQWFEVVEDVVGVKLFEAHAFPCLHAWTQNFKQVPVIKENLPDRDEMLVLFKRARENLLAS;
CP Cytoplasmic;
MF transferase activity, transferring alkyl or aryl (other than methyl) groups;
MF oxidoreductase activity;
MF ion binding;
MF isomerase activity;
BP response to stress;
BP catabolic process;
BP secondary metabolic process;
BP signal transduction;
BP anatomical structure development;
BP cellular amino acid metabolic process;
BP sulfur compound metabolic process;
BP cellular nitrogen compound metabolic process;
BP small molecule metabolic process;
BP biosynthetic process;
BP carbohydrate metabolic process;
BP cellular protein modification process;
CC intracellular;
CC cell;
CC cytoplasm;
CC cytosol;
CC plastid;
CC organelle;
//
SN 29;
SD PavGST8;
SQ MSAFTKKGEEKEKVAKEARENLKILESGLGGKQFFGGESIGFADIAAGWIGLWTRIVEEIAEVNLIDTETMPLLNAWFGRVLEFPILKECLPPQDILLEHIRGFHKILTAASS;
CP Cytoplasmic;
CP Chloroplast;
MF transferase activity, transferring alkyl or aryl (other than methyl) groups;
MF ion binding;
MF oxidoreductase activity;
BP response to stress;
BP catabolic process;
BP secondary metabolic process;
BP signal transduction;
BP anatomical structure development;
CC intracellular;
CC cell;
CC cytoplasm;
CC cytosol;
CC plastid;
CC organelle;
CC plasma membrane;
//
SN 30;
SD PavGST9;
SQ MVSQTTGDEQVKFKKESLEILQTIDDHAGTLGKKKFFGGDNIGILDIALGCIAHWTEVIEDVAGGKLFEAHAFPYLHAWTQNFKEVPAIKENLPDRDKMLVLFKRGREKLLASQRTRSLHSQRTELADAVTAMSLLYQLKLRFVFFRFSTEKRPKPPRRPAQPPSARLAA;
CP Cytoplasmic;
CP Mitochondrial;
CP Nuclear;
MF transferase activity, transferring alkyl or aryl (other than methyl) groups;
MF oxidoreductase activity;
MF ion binding;
BP response to stress;
BP signal transduction;
BP cellular amino acid metabolic process;
BP sulfur compound metabolic process;
BP catabolic process;
BP secondary metabolic process;
BP cellular nitrogen compound metabolic process;
BP small molecule metabolic process;
BP anatomical structure development;
BP biosynthetic process;
CC intracellular;
CC cell;
CC cytoplasm;
CC cytosol;
CC plastid;
CC organelle;
//
SN 31;
SD PavGST24;
SQ MSTTARIHPAASTVLSSTIKHHLLRPPPNAVVFRTNPNFVRRRGTIRTLTVAAAAPFEVCAKASVTVPNKLGDCKSVSVW;
CP Mitochondrial;
CP Chloroplast;
CP Nuclear;
MF oxidoreductase activity;
MF transferase activity, transferring alkyl or aryl (other than methyl) groups;
BP cellular protein modification process;
CC intracellular;
CC cell;
CC cytoplasm;
CC plastid;
CC organelle;
//
SN 32;
SD PavGST40;
SQ MALKLHGLPLSTCTGRVLTIFHEKSLDFELVPVNLPAGEHKQPAFLAKNPFGQIPVLEDGDLTLFESRAITAYVAEKFKDTGADLIRHNNLKEAALVKVWTEAESQNFNPAISAIVFQYLVAPMYGMTPDQAVIDANLEKLAKVLDVYEARLSSTKYLAGDFYSLADLNHLPYTHYFMKTPWASLVNERPHVKAWWEDISSRPAFKKVAEVMTIGQK;
CP Cytoplasmic;
MF transferase activity, transferring alkyl or aryl (other than methyl) groups;
MF oxidoreductase activity;
MF ion binding;
MF RNA binding;
MF translation factor activity, nucleic acid binding;
MF protein binding transcription factor activity;
MF isomerase activity;
MF lyase activity;
BP catabolic process;
BP secondary metabolic process;
BP response to stress;
BP small molecule metabolic process;
BP cellular amino acid metabolic process;
BP translation;
BP biosynthetic process;
BP sulfur compound metabolic process;
BP cellular nitrogen compound metabolic process;
BP nitrogen cycle metabolic process;
CC intracellular;
CC cell;
CC cytoplasm;
CC cytosol;
CC nucleus;
CC vacuole;
CC organelle;
CC mitochondrion;
CC extracellular region;
CC protein complex;
//
SN 33;
SD PavGST17;
SQ MAIEIAVKAAAGAPDVLGDCPFCQRVLLTLEEKKVTYKFHLITLSDKPKWFTEVNPEGKVPVAKFDDKWLADSDVIVGIIEEKYPEPSLKTPPEFASVGSKIFGSFVTFFKSKDPSDGSEQALVNELKALDEHLKAHSPYIAGEKITAADLSLAPKLFHLKVALGHFKKWTVPEDLTSYYKYTELLFSRESFVKTKTEEKYVIAGWESKVNP;
CP Cytoplasmic;
CP ER;
MF oxidoreductase activity;
MF transferase activity, transferring alkyl or aryl (other than methyl) groups;
MF ion binding;
MF transmembrane transporter activity;
MF protein binding;
MF isomerase activity;
BP cellular protein modification process;
BP response to stress;
BP signal transduction;
BP transport;
BP cell differentiation;
BP anatomical structure development;
BP cell morphogenesis;
BP homeostatic process;
BP embryo development;
BP neurological system process;
BP carbohydrate metabolic process;
BP catabolic process;
BP biosynthetic process;
BP small molecule metabolic process;
CC intracellular;
CC cell;
CC cytoplasm;
CC cytosol;
CC plasma membrane;
CC mitochondrion;
CC plastid;
CC organelle;
CC nucleus;
CC protein complex;
CC cytoplasmic membrane-bounded vesicle;
CC microtubule organizing center;
CC cytoskeleton;
CC nuclear envelope;
CC Golgi apparatus;
//
SN 34;
SD PavGST41;
SQ MKLKVYVDRLSQPSRAILIFLKANGIEFEEVKIDIVKRQHKSPEFKIMQFLPILLVHFLEYPSDLFARAKINSVLDWHHSNLRRGAATYVLHTVLAPVLGLQSNPQAAAEAETLLSSSLSTIESIWLKGNGKFLLGGFRPSIADLSLVCEIMQLELLEKKDRSRILDPHTKVLQWIENTKNATRPHFYEVHDILYRAKTRFQEQRLKRASNKTDSSDRLALPSKM;
CP Mitochondrial;
CP Nuclear;
MF oxidoreductase activity;
MF transferase activity, transferring alkyl or aryl (other than methyl) groups;
MF DNA binding;
BP catabolic process;
BP secondary metabolic process;
BP cellular amino acid metabolic process;
BP sulfur compound metabolic process;
BP cellular nitrogen compound metabolic process;
BP small molecule metabolic process;
CC intracellular;
CC cell;
CC nucleus;
CC cytoplasm;
CC peroxisome;
CC organelle;
CC cytosol;
//
SN 35;
SD PavGST10;
SQ MDEDEVVLLGFWTSPYVMRVKIALAEKGVHYYYLEEGNLFKNKSTLLLEMNPVFKKVPVLIHNDKSICESLIILQYIDDFWNDRAPILSEDPYQRAQARFWVDFFDKKIADCGRRMWASKGADQEAAKKEFIESLKLLEGELGEKPYFGGDRFGLLDIALVPFSCRFYTYETLCNFSVEKECPMLIEWVKRCSLRESVSKSLPDQHKVYDFVLEFKKMLGIN;
CP Cytoplasmic;
MF transferase activity, transferring alkyl or aryl (other than methyl) groups;
MF oxidoreductase activity;
MF ion binding;
MF isomerase activity;
BP signal transduction;
BP response to stress;
BP catabolic process;
BP secondary metabolic process;
BP cellular amino acid metabolic process;
BP sulfur compound metabolic process;
BP cellular nitrogen compound metabolic process;
BP small molecule metabolic process;
BP anatomical structure development;
BP carbohydrate metabolic process;
BP cellular protein modification process;
CC intracellular;
CC cell;
CC cytoplasm;
CC cytosol;
CC plasma membrane;
CC plastid;
CC organelle;
//
SN 36;
SD PavGST18;
SQ MAILNVSLRGTAASSSSSSLPSWPHLSNSVPFSLSKKPVIAKFPNTTILSPLKLRLQASFGKKTRASLSAIMATGGQEVLPPALTSTSDPPPLFDGKTRLYISYQCPYAQRAWISRNCKGLEEKIQLVSIDLQDRPAWYKEKVYPPNKVPSLEHNNEVKGESLDLIRYIDSHFEGPSLFPDDPAKREFAEELLSYTDSFNKSVFASFKEDGTEAADAAFDYIETALSKFEDGPFFLGTFSLVDIAYAPFLERFQPFSLEVKKYDITAGRPKLAAWFEEMNKNLAYKKTRRDPKELVESYKRRFLAQK;
CP Chloroplast;
MF transferase activity, transferring alkyl or aryl (other than methyl) groups;
MF oxidoreductase activity;
MF ion binding;
MF isomerase activity;
BP cellular protein modification process;
BP response to stress;
BP carbohydrate metabolic process;
BP catabolic process;
BP small molecule metabolic process;
BP biosynthetic process;
BP signal transduction;
BP anatomical structure development;
BP secondary metabolic process;
BP cellular amino acid metabolic process;
CC intracellular;
CC cell;
CC cytoplasm;
CC plastid;
CC organelle;
CC cytosol;
//
SN 37;
SD PavGST60;
SQ MVLKLHGFPVSPCTARVEACLHEKTLDFEFVPVDILALENKQPSFLAKNPFGQIPAFEDGDITLFESRAITAYVAEKFKGTGYDLIRHENLKEGALVKVWIEVESQQYHPAICPIVYEFFGKPVVGCKPDQTLIDASLEKLEKVLDVYETRLSSNKYLAGDFYSLADLHHFSYTFYFMKTPWSSLINDRPHVKAWWEDISARPASVKVAEGMNFGLPYHKVQITTHLLLNFLLVPNHNTVMATIKVYGSTFSTAAMRVFAALYEKDIEFELVPVDMRAGEHKKAPFISLNPFGQVPAFEDGNLKLFESRAITQYIAHEYFDKGTQLVIRDSKKMAILSVWTEVEGQKFDPAASKLTWELGIKPLLGKPTDSAVVEEYEAKLAAVLDVYEARLAQSK…
CP Cytoplasmic;
MF transferase activity, transferring alkyl or aryl (other than methyl) groups;
MF oxidoreductase activity;
MF ion binding;
MF RNA binding;
MF translation factor activity, nucleic acid binding;
MF lyase activity;
MF isomerase activity;
MF protein binding transcription factor activity;
BP signal transduction;
BP response to stress;
BP catabolic process;
BP secondary metabolic process;
BP small molecule metabolic process;
BP cellular amino acid metabolic process;
BP sulfur compound metabolic process;
BP cellular nitrogen compound metabolic process;
BP translation;
BP biosynthetic process;
BP nitrogen cycle metabolic process;
CC intracellular;
CC cell;
CC nucleus;
CC cytoplasm;
CC vacuole;
CC cytosol;
CC organelle;
CC extracellular region;
CC protein complex;
//
SN 38;
SD PavGST42;
SQ MAEENKVTLYGMWSSPYVKRVELALRLKGIPYEYVEEDLRNKSQLLLKLNPIHQKVPVLVHNGKAIVESLVILEYIDETWKTGPQLLPEDPYKRSQVRFWASYLQQVSESMVSVLKTSGEAQEKAIKEVTEKLKLLEEGLKGFFPNGFPNSFDTENVGLLEVVICSHLGANEAQEEALGVKVITPEKTPLIYSSITALTEIPAVKAASIPQEKVVAFLKFFREKALKSSAE;
CP Cytoplasmic;
MF transferase activity, transferring alkyl or aryl (other than methyl) groups;
MF ion binding;
MF oxidoreductase activity;
MF isomerase activity;
BP catabolic process;
BP secondary metabolic process;
BP response to stress;
BP signal transduction;
BP cellular amino acid metabolic process;
BP sulfur compound metabolic process;
BP cellular nitrogen compound metabolic process;
BP small molecule metabolic process;
BP anatomical structure development;
BP biosynthetic process;
BP carbohydrate metabolic process;
BP cellular protein modification process;
CC intracellular;
CC cell;
CC cytoplasm;
CC cytosol;
CC plastid;
CC organelle;
//
SN 39;
SD PavGST43;
SQ MAEENKVTLYGMWVSPYVKRVELALRLKGIPYEYVEEDLRNKSPLLLKFNPVHQKVPVLVHNGKAIVESLVILEYIDETWKTGPQLLPEDPYKRSQVRFWASYLQQVFESMISVVKTSGEAQEKAMKEVTEKLKLLEEGLKGFFPNGFPNSFDKENVGLLEVVICSHFGSYEAQEEALGVKFITPENTPLIYSSITALTEIPAVKAAHNPHEKVVAFLKFARGNALKSSAE;
CP Cytoplasmic;
MF transferase activity, transferring alkyl or aryl (other than methyl) groups;
MF ion binding;
MF oxidoreductase activity;
MF isomerase activity;
MF transmembrane transporter activity;
BP catabolic process;
BP secondary metabolic process;
BP response to stress;
BP signal transduction;
BP cellular amino acid metabolic process;
BP sulfur compound metabolic process;
BP cellular nitrogen compound metabolic process;
BP small molecule metabolic process;
BP biosynthetic process;
BP carbohydrate metabolic process;
BP cellular protein modification process;
CC intracellular;
CC cell;
CC cytoplasm;
CC cytosol;
CC plastid;
CC organelle;
//
SN 40;
SD PavGST44;
SQ MAEENKVTLYGMWASPYVKRVELALRLKGIPYEYVEEDLRNKSPLLLKLNPVHQKVPVFAHNGKPIVESLVILEYIDETLETGPRLVPEDPKFASGQALCKSSVVKPNGDAQDKTMKQVTETMKLLEEGLKGFFPDGLKRD;
CP Cytoplasmic;
MF transferase activity, transferring alkyl or aryl (other than methyl) groups;
MF ion binding;
MF oxidoreductase activity;
MF isomerase activity;
BP catabolic process;
BP secondary metabolic process;
BP response to stress;
BP signal transduction;
BP anatomical structure development;
BP cellular amino acid metabolic process;
BP sulfur compound metabolic process;
BP cellular nitrogen compound metabolic process;
BP small molecule metabolic process;
BP biosynthetic process;
BP carbohydrate metabolic process;
BP cellular protein modification process;
CC intracellular;
CC cell;
CC cytoplasm;
CC cytosol;
CC plastid;
CC organelle;
//
SN 41;
SD PavGST45;
SQ MAGEKSESVIVHGFWASPYSKRVELALKLKGISYEYVEEDFKNKTPELLKYNPVSKKVPVLVHNGKPIAESLVILQYIEDTWKNGPHLLPEDPYKRAQVRFWVDFVHQKFSGIMMTAVKTEGETQEKALNEVYELLKVLEEGIKSFYPDGIPTFEAKNLSLLEVVASSILCLFKAPEEILGIKVIDPEKTPLLFSWVEAIRELSLVQETIPSHEKIVALLGTLRQLAINPPSQS;
CP Cytoplasmic;
MF transferase activity, transferring alkyl or aryl (other than methyl) groups;
MF ion binding;
MF oxidoreductase activity;
MF isomerase activity;
MF lyase activity;
BP catabolic process;
BP secondary metabolic process;
BP response to stress;
BP signal transduction;
BP cellular amino acid metabolic process;
BP sulfur compound metabolic process;
BP cellular nitrogen compound metabolic process;
BP small molecule metabolic process;
BP anatomical structure development;
BP biosynthetic process;
BP cellular protein modification process;
BP carbohydrate metabolic process;
CC intracellular;
CC cell;
CC cytoplasm;
CC cytosol;
CC plasma membrane;
CC plastid;
CC organelle;
//
SN 42;
SD PavGST46;
SQ MAEGNKVTLHGSWLSLYTKRVELALKTKGIPFEFVEADLNNKSPLLLKYNPVHKKVPVLVRNGKPILSHSSFLSRGGPWGVRAGHQNQWTGSVLEYIDETWKTGPGLLPEDPYERARVRFWASFVHQQVFESLSLACRSDGEVQEKAIKELLEKLKTFEEGMKEFFPDSIDSIERTKNLGLLDIVLYSGFGAHKVPEEVLGTKIIDPEKTPLIFSWLTALNELPLVKELTPPHEKLVAVLQFFRNNALKCGAA;
CP Cytoplasmic;
CP Mitochondrial;
MF transferase activity, transferring alkyl or aryl (other than methyl) groups;
MF ion binding;
MF oxidoreductase activity;
BP catabolic process;
BP secondary metabolic process;
BP response to stress;
BP cellular amino acid metabolic process;
BP sulfur compound metabolic process;
BP cellular nitrogen compound metabolic process;
BP small molecule metabolic process;
BP anatomical structure development;
BP signal transduction;
BP biosynthetic process;
CC intracellular;
CC cell;
CC cytoplasm;
CC cytosol;
CC plasma membrane;
CC plastid;
CC organelle;
//
SN 43;
SD PavGST47;
SQ MEEENRVKLHGMWASTYSKRVEIALRLKGIPYEYIEEDLSNKSQLLLKYNPVHKKVPVLVHNGKSIVESYIILDYIDETWKKAPQDPA;
CP Cytoplasmic;
CP Mitochondrial;
MF transferase activity, transferring alkyl or aryl (other than methyl) groups;
MF ion binding;
MF oxidoreductase activity;
MF isomerase activity;
BP catabolic process;
BP secondary metabolic process;
BP response to stress;
BP signal transduction;
BP anatomical structure development;
BP cellular amino acid metabolic process;
BP sulfur compound metabolic process;
BP cellular nitrogen compound metabolic process;
BP small molecule metabolic process;
BP biosynthetic process;
BP carbohydrate metabolic process;
CC intracellular;
CC cell;
CC cytoplasm;
CC cytosol;
CC plasma membrane;
CC plastid;
CC organelle;
//
SN 44;
SD PavGST48;
SQ MAEGNKVALHGSWSLYTKRVELALKTKGIPFEFVEEDLKNKSPLLLKYNPVYKKVPVLVHNGKPIVESLIILEYIDETWKTGPGLLPEDPYKRARVRFWASFVHQQVFESLSLACRSDGEVQEKAIKELLEKLKTFEEGMKEFFPDGIASIERSKTLGLLDIVLCSVFGPHKVQEALLGIKIIDPEKTPLIFSWVTALTELPLVKELTPPHEKLLAILQLFRNNALKSGAAA;
CP Cytoplasmic;
MF transferase activity, transferring alkyl or aryl (other than methyl) groups;
MF ion binding;
MF oxidoreductase activity;
MF isomerase activity;
BP catabolic process;
BP secondary metabolic process;
BP response to stress;
BP signal transduction;
BP cellular amino acid metabolic process;
BP sulfur compound metabolic process;
BP cellular nitrogen compound metabolic process;
BP small molecule metabolic process;
BP biosynthetic process;
BP carbohydrate metabolic process;
BP cellular protein modification process;
CC intracellular;
CC cell;
CC cytoplasm;
CC cytosol;
CC plasma membrane;
CC plastid;
CC organelle;
//
SN 45;
SD PavGST25;
SQ MVVKVYGPVKAACPQRVMVCLLEKGVNFEIVDVNLEVGEQKRPQFLSRQPFGQVPVVEDGDFRLFESRAIIRYYAAKYADRGPNLLGTTLEEKALVDQWLEVEAHNFNDLVYTLVLQLLVLPRMGERGDVALVHACEEKLEKVFDVYEERLSKSSYLAGEAFTLADLSHLPGIRYLIDEAKLGHLVTERKNVNAWWKDISNRPAWKKLMSLASDY;
CP Cytoplasmic;
MF transferase activity, transferring alkyl or aryl (other than methyl) groups;
MF ion binding;
MF oxidoreductase activity;
MF RNA binding;
MF translation factor activity, nucleic acid binding;
BP response to stress;
BP catabolic process;
BP secondary metabolic process;
BP small molecule metabolic process;
BP signal transduction;
BP translation;
BP biosynthetic process;
BP cellular amino acid metabolic process;
CC intracellular;
CC cell;
CC cytoplasm;
CC cytosol;
CC nucleus;
CC vacuole;
CC organelle;
CC plasma membrane;
CC cell wall;
CC external encapsulating structure;
CC protein complex;
//
SN 46;
SD PavGST61;
SQ MASQNRPFHVFLFPFMAHGHMIPVSDMAKLFAAQGVKTTIITTPLNAPTFSKATRSRKTNSGGIEIEIKTIEFPSLEAGLPEGCEILDSLPTPELLYSFFKAAGLLQEPLERLLLEDQPTCLVADMFFSWATDAAAKFGIPRLIFHGTSFFSLAASDCVGRYEPFKNTSSDSEPFVIPNFPGEIKMTRAQVPDFVKYNIENDLTPLIKHAKEAEVRSYGIVVNSFYELEPVYADYFRKGLKYKARSLEPRGQVPGSGDPGPEGWTNRRVLKREPPAQFFIPLLRGEKSPFIGEGESPLLAVFRCGTPLALLRVPFSLLVACPFGMRLRIALAEKGVQYEYKDEDLRNKSPLLLQSNPVHKKIPVLIHNGKAVSESLIAVQYIDEVWKDKAPLLPSD…
CP Cytoplasmic;
CP Chloroplast;
MF transferase activity, transferring alkyl or aryl (other than methyl) groups;
MF oxidoreductase activity;
MF ion binding;
MF transferase activity, transferring glycosyl groups;
BP signal transduction;
BP response to stress;
BP catabolic process;
BP secondary metabolic process;
BP biosynthetic process;
BP small molecule metabolic process;
BP cellular amino acid metabolic process;
BP sulfur compound metabolic process;
BP cellular nitrogen compound metabolic process;
BP carbohydrate metabolic process;
BP cellular protein modification process;
CC intracellular;
CC cell;
CC cytoplasm;
CC cytosol;
CC plastid;
CC organelle;
//
SN 47;
SD PavGST11;
SQ MHIFDLLMVLHAGKTNKNAFKTLIVAEYTGVKVELAPDFEMGVTNKTPEYLKLNPIGKVPLLETPDGPIFESNAIARYVARLKADNPLIGSSLIDYAHIEQWIDFGSLEIDANIISWFRPRFGYAVYLPPAEEAAISALKRALGALNTHLASNTYLVGHFVTLADIIVTCNLFFGFTKLMTKSFTSEFPHVERYFWTLVNQPKFKKVLGDVKQTESVPPVPSAKKPSQPKETKSKAKEEPKKEAKKEPAKPKAEAAEEVEEAPKPKPKNPLDLLPPSNMVLDDWKRLYSNTKTNFREVAIKGFWDMYDPEGYSLWFCEYKYNDENTVSFVTLNKVGGFLQRMDLARKYAFGKMLVIGSEPPFKVKGLWLFRGQEIPPFVMEECYDMELYNWTKVDL…
CP Cytoplasmic;
MF RNA binding;
MF translation factor activity, nucleic acid binding;
MF ion binding;
MF transferase activity, transferring alkyl or aryl (other than methyl) groups;
MF oxidoreductase activity;
MF hydrolase activity;
MF ligase activity;
BP translation;
BP biosynthetic process;
BP anatomical structure development;
BP ribosome biogenesis;
BP response to stress;
BP catabolic process;
BP secondary metabolic process;
BP small molecule metabolic process;
BP signal transduction;
BP tRNA metabolic process;
BP cellular amino acid metabolic process;
BP cellular nitrogen compound metabolic process;
BP sulfur compound metabolic process;
CC intracellular;
CC cell;
CC cytoplasm;
CC protein complex;
CC vacuole;
CC plasma membrane;
CC organelle;
CC cytosol;
CC nucleus;
CC mitochondrion;
//
SN 48;
SD PavGST12;
SQ MASESGDDQQLKLYSYWRSTCSFRVRIALNLKGLKYEYKAVNLVKGEQFSPEFTKLNPIGYVPVLVDGDFVVADSFAILMYLEDKYPQHPLLPQDLQKKAINYQAANIVSSSIQPLQNLAILKYIEEKVSPEEKLEWAKVHIGKGFAALEKLLNNYAGRYATGDEVFLADLFLAPQLYAAIGRFHVDMTQFPLLARLHEAYSKIPEFRDALPENQPDAPSS;
CP Cytoplasmic;
MF transferase activity, transferring alkyl or aryl (other than methyl) groups;
MF oxidoreductase activity;
MF isomerase activity;
MF ion binding;
MF lyase activity;
BP cellular amino acid metabolic process;
BP small molecule metabolic process;
BP response to stress;
BP catabolic process;
BP secondary metabolic process;
BP sulfur compound metabolic process;
BP cellular nitrogen compound metabolic process;
BP signal transduction;
BP biosynthetic process;
BP cellular protein modification process;
BP nitrogen cycle metabolic process;
CC intracellular;
CC cell;
CC cytoplasm;
CC cytosol;
CC mitochondrion;
CC organelle;
CC nucleus;
CC plasma membrane;
CC extracellular region;
//
SN 49;
SD PavGST26;
SQ MVVKVYGSIDASPQRVLACLVEKEIDFEIIPIDLFKGEHKDLEFLKLQPFGQVPVIQDGDYTLYESRAIMRYYAEKFKSQGTELLGKTIEERGLVEQWLEVEAQRFHPPVYKLVVHILLASALGFPSXXXXXXXXXXXXXXXDPKIIQESEAKLGKVLDIYEERLSKSKYLAGDFFSLADLSHLPFSQHLVADLGKEHMIRDRKHVSAWWDDISNRPSWKKVLQLGVFELPK;
CP Cytoplasmic;
MF oxidoreductase activity;
MF transferase activity, transferring alkyl or aryl (other than methyl) groups;
MF ion binding;
MF lyase activity;
MF isomerase activity;
MF RNA binding;
MF translation factor activity, nucleic acid binding;
MF protein binding transcription factor activity;
BP response to stress;
BP catabolic process;
BP secondary metabolic process;
BP small molecule metabolic process;
BP signal transduction;
BP cellular amino acid metabolic process;
BP sulfur compound metabolic process;
BP cellular nitrogen compound metabolic process;
BP translation;
BP biosynthetic process;
BP nitrogen cycle metabolic process;
CC extracellular region;
CC intracellular;
CC cell;
CC cytoplasm;
CC vacuole;
CC cytosol;
CC plasma membrane;
CC organelle;
CC nucleus;
CC protein complex;
//
SN 50;
SD PavGST13;
SQ MQLYHHPYSLDSQRVRLALEEKGIDYTSFHVNPVTGKNMDASFFRRNTNAKLPVFQNGSHVIFDTIEIIQQVLIARMAETPDLAADYHKKLKEAYETEEKLKNPDVLKQDKEHLVRLLDEVETQLNETAYLAGKEFSMADVMLIPVLARLVILNLEDEYIGGRPNMAKYWIMVQQRPSYKKVIGKHFCGWRKHKTLVKTWCIVHIRTMLRKF;
CP Cytoplasmic;
CP Mitochondrial;
CP Nuclear;
MF transferase activity, transferring alkyl or aryl (other than methyl) groups;
MF ion binding;
MF oxidoreductase activity;
MF isomerase activity;
MF RNA binding;
MF translation factor activity, nucleic acid binding;
BP response to stress;
BP catabolic process;
BP secondary metabolic process;
BP signal transduction;
BP protein targeting;
BP transport;
BP mitochondrion organization;
BP cellular amino acid metabolic process;
BP small molecule metabolic process;
BP translation;
BP biosynthetic process;
CC cell;
CC plasma membrane;
CC intracellular;
CC cytoplasm;
CC vacuole;
CC cytosol;
CC organelle;
CC mitochondrion;
CC protein complex;
//
SN 51;
SD PavGST50;
SQ MAYKHEDLSPPLDSTSSPPPLFDGTTRLYVCYTCPFAQRVWITRNYKGLQDKIKLVPINLQNRPAWYKEKVYPENKVPSLEHNGKVIGESLDLIKYMDSNFEGPSLFPTDPERRKFGEELITYTDTFTRALYSSFKGDAVKEADAQFDYLENALKKFDDGPFFLGQFSLVDIAYIPFVERLQVFLSEVFKYDITAGRPKLAAWLEEINKIEAYKVTKTDPKELVEFYKKRFLDQQ;
CP Cytoplasmic;
MF transferase activity, transferring alkyl or aryl (other than methyl) groups;
MF oxidoreductase activity;
MF ion binding;
MF isomerase activity;
BP cellular protein modification process;
BP response to stress;
BP carbohydrate metabolic process;
BP catabolic process;
BP small molecule metabolic process;
BP biosynthetic process;
BP signal transduction;
BP anatomical structure development;
BP secondary metabolic process;
BP cellular amino acid metabolic process;
BP sulfur compound metabolic process;
BP cellular nitrogen compound metabolic process;
CC intracellular;
CC cell;
CC cytoplasm;
CC cytosol;
CC plastid;
CC organelle;
//
SN 52;
SD PavGST19;
SQ LFRTWSSPFPLRIVWALELKGVPYETIYEDLSNKSPLLLQYNPIHKKVPVLVHNGKPIVESLVILEYIDETWKENPLLPEDPLERAAARFWAKFGDEKVLPSYWESFTNEGKEQEEAIVKAKENLKYLEEELKGKKFFGGEKLGLADIALGWLVLYGSSVFEDVAGIKLLTEEEFPLLSAWKLTFADAPIIKDNWPSRDKLIAKFKATREDHLLKKAPK;
CP Cytoplasmic;
MF transferase activity, transferring alkyl or aryl (other than methyl) groups;
MF ion binding;
MF oxidoreductase activity;
MF isomerase activity;
BP response to stress;
BP signal transduction;
BP catabolic process;
BP secondary metabolic process;
BP cellular amino acid metabolic process;
BP sulfur compound metabolic process;
BP cellular nitrogen compound metabolic process;
BP small molecule metabolic process;
BP anatomical structure development;
BP biosynthetic process;
BP carbohydrate metabolic process;
BP cellular protein modification process;
CC intracellular;
CC cell;
CC cytoplasm;
CC cytosol;
CC plasma membrane;
CC plastid;
CC organelle;
//
SN 53;
SD PavGST20;
SQ MAEVKLFRTWSSRFALRIVWALKLKGVPYETIYEDLSNKSPLLLQYNPIHKKVPVLVHNGKPIVESLVILEYIDETWKENPLLPEDPLERAAARFWAKFGDEKVLPSIWESFTSEGKEQEEGIVKAKENLKYLEEELKGKKFFGGEKLGLADIALGWLALYGNSVFEDVAGIKLLTEEEFPLLSAWKLTFADAPIIKDNWPSRDKLVAKFQATREDHLLKKAPK;
CP Cytoplasmic;
MF transferase activity, transferring alkyl or aryl (other than methyl) groups;
MF ion binding;
MF oxidoreductase activity;
MF isomerase activity;
BP signal transduction;
BP response to stress;
BP catabolic process;
BP secondary metabolic process;
BP cellular amino acid metabolic process;
BP sulfur compound metabolic process;
BP cellular nitrogen compound metabolic process;
BP small molecule metabolic process;
BP anatomical structure development;
BP biosynthetic process;
BP carbohydrate metabolic process;
BP cellular protein modification process;
CC intracellular;
CC cell;
CC cytoplasm;
CC cytosol;
CC plasma membrane;
CC plastid;
CC organelle;
//
SN 54;
SD PavGST21;
SQ HKKVPVLVHNGKPIVESLVILEYIDETWKENPLLPEDPLERAAARFWAKFGDEKVLPSIWESFTNEGKEQEEAIVKAKENLKYLEEELKGKKFFGGEKLGLADIALGWLAYYGSSVFEDVAGMKLLTEEEFPLLSAWKLTFADGPIIKDNWPSRDKLIAKFQATREDHLLKKAPK;
CP Cytoplasmic;
MF transferase activity, transferring alkyl or aryl (other than methyl) groups;
MF ion binding;
MF oxidoreductase activity;
MF isomerase activity;
BP response to stress;
BP signal transduction;
BP catabolic process;
BP secondary metabolic process;
BP cellular amino acid metabolic process;
BP sulfur compound metabolic process;
BP cellular nitrogen compound metabolic process;
BP small molecule metabolic process;
BP anatomical structure development;
BP biosynthetic process;
BP cellular protein modification process;
CC intracellular;
CC cell;
CC cytoplasm;
CC cytosol;
CC plasma membrane;
CC extracellular region;
CC plastid;
CC organelle;
//
SN 55;
SD PavGST22;
SQ MAEVKLFRTWSSPFALRIVWALKLKGVPYETIYEDLSNKSPLLLQYNPIHKKVPVLVHNGKPIVESFVVLEYIDETWKEKPLLPEDPLERAAARYWAKFGDDKVLPSIWESFINEGKEQEEAIVKAKENLKYLEEELKGKKFFGGEKLGFVDIALGWLAHYESSVFEDATGMKLLTEEEFPLLSAWKLTFADAPIIKDNWPSRDKLVAKFQAIREDHLLKKAPK;
CP Cytoplasmic;
MF transferase activity, transferring alkyl or aryl (other than methyl) groups;
MF ion binding;
MF oxidoreductase activity;
MF isomerase activity;
BP signal transduction;
BP response to stress;
BP catabolic process;
BP secondary metabolic process;
BP cellular amino acid metabolic process;
BP sulfur compound metabolic process;
BP cellular nitrogen compound metabolic process;
BP small molecule metabolic process;
BP anatomical structure development;
BP biosynthetic process;
BP carbohydrate metabolic process;
BP cellular protein modification process;
CC intracellular;
CC cell;
CC cytoplasm;
CC cytosol;
CC plastid;
CC organelle;
//
SN 56;
SD PavGST51;
SQ AEEVKHFGVKGSPLSLRVDIALRLKGVKSKFCEEDLQNKSPLLIKYNPVHKKVPVLVHNEKPIAESLVILEYIDETWKHQGPPILPQDPYQRANARFWASFIDEKCSPAICKAYWEIEGHEKAMEEACELLQFLENELKDNKFFGGETIGFVDMAASFIGYWLRPIQEAVGVEVLTKEKCPKLYDWCDEFVSHSVVKEVLPPNKETLIAFFLGRCESTKLLAK;
CP Cytoplasmic;
MF transferase activity, transferring alkyl or aryl (other than methyl) groups;
MF ion binding;
MF oxidoreductase activity;
MF isomerase activity;
BP response to stress;
BP catabolic process;
BP secondary metabolic process;
BP signal transduction;
BP cellular amino acid metabolic process;
BP sulfur compound metabolic process;
BP cellular nitrogen compound metabolic process;
BP small molecule metabolic process;
BP anatomical structure development;
BP biosynthetic process;
BP carbohydrate metabolic process;
BP cellular protein modification process;
CC intracellular;
CC cell;
CC cytoplasm;
CC cytosol;
CC plasma membrane;
CC plastid;
CC organelle;
//
SN 57;
SD PavGST52;
SQ MGEEVKLLGVWGSPFSSRVEIALRLKGVQYEFFEEDLHNKSALLLKSNPVHKKIPVLLHNDKPIAESHVVLEYIDETWKQGFSILPEDPFERAHARFWARFLDEKCLPAIWKACWGSEEPEKAVEEACELLKLLEHELKGNKFFGGEKVGLVDIVGNFIAYWLRAIQEVVGVEILTKEKFPKIYDWSDEFVNVLQEILPRRDKLVAIFRGRFESTTTTTSN;
CP Cytoplasmic;
MF transferase activity, transferring alkyl or aryl (other than methyl) groups;
MF ion binding;
MF oxidoreductase activity;
MF isomerase activity;
BP catabolic process;
BP secondary metabolic process;
BP response to stress;
BP signal transduction;
BP cellular amino acid metabolic process;
BP sulfur compound metabolic process;
BP cellular nitrogen compound metabolic process;
BP small molecule metabolic process;
BP anatomical structure development;
BP biosynthetic process;
BP carbohydrate metabolic process;
CC intracellular;
CC cell;
CC cytoplasm;
CC cytosol;
CC plasma membrane;
CC plastid;
CC organelle;
//
SN 58;
SD PavGST62;
SQ MADEEVVVLGFWTSTYGTRATIALDEKGVKYEYREEDLSNKSSLLLQMNPVHKKIPVLIHNGKPVCESLIIVQYVDEVWRDKAPLLPSDPYQRARARFWADFIDKKVFDAGKKLWSTKGEEHEAAKKEFIEILTQLEGELGDKPYFGGERFGFLDVALITFYSWFYAFETFGNFSTEAECPKLIEWAKRCTHRESVSKSLADPKKVYEFLLGRIAG;
CP Cytoplasmic;
MF transferase activity, transferring alkyl or aryl (other than methyl) groups;
MF oxidoreductase activity;
MF ion binding;
MF isomerase activity;
BP signal transduction;
BP response to stress;
BP catabolic process;
BP secondary metabolic process;
BP cellular amino acid metabolic process;
BP sulfur compound metabolic process;
BP cellular nitrogen compound metabolic process;
BP small molecule metabolic process;
BP anatomical structure development;
BP biosynthetic process;
BP carbohydrate metabolic process;
BP cellular protein modification process;
BP translation;
CC intracellular;
CC cell;
CC cytoplasm;
CC cytosol;
CC plasma membrane;
CC plastid;
CC organelle;
//
SN 59;
SD PavGST37;
SQ MRGIAAAQGEEATKVAIEQVAEGLALLEDAFEKTSKGKDFFSGDKIGYLDIAFGCFLGWLRMTEKMNGVKLLDETKTPGLAKWAHKFCADAAVKYVMPETEKLAEVAKIITAKLRGKIAEADKLFHEMVSKGLEPDEVTYTALIDGYCKVGQHWAKLSRLGSSKDTTHAMLDFT;
CP Cytoplasmic;
MF transferase activity, transferring alkyl or aryl (other than methyl) groups;
MF ion binding;
MF RNA binding;
BP response to stress;
BP catabolic process;
BP secondary metabolic process;
BP cellular nitrogen compound metabolic process;
BP anatomical structure development;
BP signal transduction;
CC intracellular;
CC cell;
CC cytoplasm;
CC cytosol;
CC plastid;
CC organelle;
CC mitochondrion;
//
SN 60;
SD PavGST14;
SQ MALVLHAGNTNKNGFKALIAAEYTGVKVELVKNFEMGVSNKSPKFLEMNPIGKVPVLETPDGPVFESNAIARYVTRLKADNPLFGSSLIEYAHVEQWIDFATMEIDANILRWLIPRIGFAVYLPPAEEAAISALKRALTALNTHLSSNTYLVGHSVTLADIIMACNLTLGFSRVLTKKFTSEFPHVERYFWTLVNQPNFRKILGEVKQAESVPSIQSAKKPSQAKEPTKPKDEPKKEAKKEPAKPKLEEAVAEEEAPKPRAKNPLDLLPPSKMILDEWKRLYSNTKTNFREVAVKGFWDMYDPEGYSLWFCDYKYNDENTVSFVTLNKVGGFLQRMDLARKYAFGKMLVIGSEPPFKVKGLWLFRGQEIPKFIIDECYDMELYDWHKVDITDEDQK…
CP Cytoplasmic;
MF RNA binding;
MF translation factor activity, nucleic acid binding;
MF ion binding;
MF transferase activity, transferring alkyl or aryl (other than methyl) groups;
MF hydrolase activity;
MF ligase activity;
MF oxidoreductase activity;
MF lyase activity;
BP translation;
BP biosynthetic process;
BP ribosome biogenesis;
BP anatomical structure development;
BP response to stress;
BP catabolic process;
BP secondary metabolic process;
BP tRNA metabolic process;
BP cellular amino acid metabolic process;
BP cellular nitrogen compound metabolic process;
BP small molecule metabolic process;
BP signal transduction;
BP sulfur compound metabolic process;
CC intracellular;
CC cell;
CC cytoplasm;
CC protein complex;
CC vacuole;
CC plasma membrane;
CC organelle;
CC cytosol;
CC mitochondrion;
CC nucleus;
//
SN 61;
SD PavGST15;
SQ MCITIITTSGKLSEAEVILREMMALWYPSLKGIGAAQGEEAKKAAVEQVEAGLALLEEAYEKSSKGRDFFGGDEIGYLDIAFGCFMGWLRVIEKLNGVKLLDQAKTPGLVNWADKFCAHAAVKDVMPETDKLAEIAKILAAKLRGAAAPPK;
CP Cytoplasmic;
CP Chloroplast;
MF transferase activity, transferring alkyl or aryl (other than methyl) groups;
BP cellular amino acid metabolic process;
BP sulfur compound metabolic process;
BP response to stress;
BP catabolic process;
BP secondary metabolic process;
BP cellular nitrogen compound metabolic process;
BP small molecule metabolic process;
BP anatomical structure development;
BP biosynthetic process;
BP signal transduction;
CC intracellular;
CC cell;
CC cytoplasm;
CC cytosol;
CC plastid;
CC organelle;
CC nucleus;
//
SN 62;
SD PavGST23;
SQ MEASSEQQKKSENSSSSSSSKLLLYSYWQSSCSWRVRFALSLKGLPYEYKPVNITKGEQFSPDFKRLNPLHFVPVLVDGDIVVSDSYAILLYLEDKYPQRPLLPADPRLKALNLQAASIINSNIQPLHMVSLLKHLEEKVGPEESLSFAQLNIEKGLLALEMLLKDFASRYATGDEVYMADVFLAPQIVVSTTRFNINMSKFPTLSRLYESYKILPELEASSPERQPDAVH;
CP Nuclear;
MF transferase activity, transferring alkyl or aryl (other than methyl) groups;
MF oxidoreductase activity;
MF isomerase activity;
MF ion binding;
MF lyase activity;
BP cellular amino acid metabolic process;
BP small molecule metabolic process;
BP catabolic process;
BP secondary metabolic process;
BP response to stress;
BP sulfur compound metabolic process;
BP cellular nitrogen compound metabolic process;
BP signal transduction;
CC intracellular;
CC cell;
CC cytoplasm;
CC cytosol;
CC organelle;
CC plasma membrane;
CC extracellular region;
CC nucleus;
//
SN 63;
SD PavGST64;
SQ MEASSEQQKKSENSSSSSSSKLLLYSYWQSSCSWRVRFALSLKGLPYEYKPVNITKGEQFSPDFKRLNPLHFVPVLVDGDIVVSDSYAILLYLEDKYPQRPLLPADPRLKALNLQAASIINSNIQPLHMVSLLKHLEEKVGPEESLSFAQLNIEKGLLALEMLLKDFASRYATGDEVYMADVFLAPQIVVSTTRFNINMSKFPTLSRLYESYKILPELEASSPERQPDAVH;
CP Nuclear;
MF transferase activity, transferring alkyl or aryl (other than methyl) groups;
MF oxidoreductase activity;
MF isomerase activity;
MF ion binding;
MF lyase activity;
BP cellular amino acid metabolic process;
BP small molecule metabolic process;
BP catabolic process;
BP secondary metabolic process;
BP response to stress;
BP sulfur compound metabolic process;
BP cellular nitrogen compound metabolic process;
BP signal transduction;
CC intracellular;
CC cell;
CC cytoplasm;
CC cytosol;
CC organelle;
CC plasma membrane;
CC extracellular region;
CC nucleus;
//
SN 64;
SD PavGST16;
SQ MATTPVKVYGPPISTAVSRVLACLLEKGVDYQLISVNMSKGEHKKPDYLKIQPFGQVPAFQDEDISLFESRAICRYICNKYADQGNKGLYGTNPLAKASIDQWLEAEGQSFSPPSSTLVFQLAFAPRMKLKQDQGVIRQNEEKLKKVLDVYENRLGESRFLAGDEFSLADLSHLPNGHYLVNATDRGELFTSRNNVGRWWTEISTRDSWEKVVEMQKPTAN;
CP Cytoplasmic;
CP Nuclear;
MF transferase activity, transferring alkyl or aryl (other than methyl) groups;
MF oxidoreductase activity;
MF ion binding;
MF RNA binding;
MF translation factor activity, nucleic acid binding;
MF lyase activity;
MF protein binding transcription factor activity;
MF isomerase activity;
BP signal transduction;
BP response to stress;
BP catabolic process;
BP secondary metabolic process;
BP small molecule metabolic process;
BP translation;
BP biosynthetic process;
BP cellular amino acid metabolic process;
BP sulfur compound metabolic process;
BP cellular nitrogen compound metabolic process;
BP nitrogen cycle metabolic process;
CC intracellular;
CC cell;
CC nucleus;
CC cytoplasm;
CC vacuole;
CC cytosol;
CC organelle;
CC extracellular region;
CC plasma membrane;
CC protein complex;
//
SN 65;
SD PavGST65;
SQ MEEVKVLGFWTSPYPYRVIWALRLKGVKYEYIEDDIYNKSDLLLRSNPVHKMVPVFFHGGKIIAESTVILEYIEETWLQNPLLPNDPYARAMARFWTKFGDDKRPNFFEFFWTTGDEQAKAVKHAQELMTIWEQQGLGEKKFFNGDEIGMTDLAFGWIAFWLEAMEEAAGVRVLEVNSFPRLQAWIKNFKEVPVIKENHPDKSLLLGYMKERRAVHVKPATS;
CP Cytoplasmic;
MF transferase activity, transferring alkyl or aryl (other than methyl) groups;
MF ion binding;
MF oxidoreductase activity;
MF isomerase activity;
BP signal transduction;
BP response to stress;
BP catabolic process;
BP secondary metabolic process;
BP cellular amino acid metabolic process;
BP sulfur compound metabolic process;
BP cellular nitrogen compound metabolic process;
BP small molecule metabolic process;
BP anatomical structure development;
BP biosynthetic process;
BP carbohydrate metabolic process;
BP cellular protein modification process;
CC intracellular;
CC cell;
CC cytoplasm;
CC cytosol;
CC plastid;
CC organelle;
//
SN 66;
SD PavGST66;
SQ MEEVKVLGYWTSPYPYRVIWALKLKGVKYEYIEDDIYNKSDLLLRSNPVHKMVPVFFHGGKIIAESTVILEYIVETWLQNPLLPNDPYARAMARFWTKFGDDMRPNFFAFFWKTGDEQAKAVKDAQELMTIWEQQGLGEKKFFNGDEIGMTDLAFGWIAFWLEAMEEAAGVQVLEVNSFLRLQAWIKNFKEVPVIKENHPDKSRLLGYMKERRAVHVKPATS;
CP Cytoplasmic;
MF transferase activity, transferring alkyl or aryl (other than methyl) groups;
MF ion binding;
MF oxidoreductase activity;
MF isomerase activity;
BP signal transduction;
BP response to stress;
BP catabolic process;
BP secondary metabolic process;
BP cellular amino acid metabolic process;
BP sulfur compound metabolic process;
BP cellular nitrogen compound metabolic process;
BP small molecule metabolic process;
BP biosynthetic process;
BP carbohydrate metabolic process;
CC intracellular;
CC cell;
CC cytoplasm;
CC cytosol;
CC plastid;
CC organelle;
//
SN 67;
SD PavGST67;
SQ MEEVKVLGFWASPYPYRVIWALKLKGVKYEYVEEDIFNKSDLLLQSNPVHKMVPVFFHGEKTIAESTVILEYIEETWPQNPLLPNDPYARAMARFWTKFGDDKRQNFLGFLKTTGDEQAKAAKEAQELLTILEQHGLGEKKFFDGNKVGMTDLAFGWIAFWLEAIEEAAGVQVLEVNSFPRLQAWIKNFKEVPVIKGNHPDKSRLLAYMKQLREVYAKPATS;
CP Cytoplasmic;
MF transferase activity, transferring alkyl or aryl (other than methyl) groups;
MF ion binding;
MF oxidoreductase activity;
MF isomerase activity;
BP catabolic process;
BP secondary metabolic process;
BP signal transduction;
BP response to stress;
BP cellular amino acid metabolic process;
BP sulfur compound metabolic process;
BP cellular nitrogen compound metabolic process;
BP small molecule metabolic process;
BP biosynthetic process;
BP carbohydrate metabolic process;
BP cellular protein modification process;
CC intracellular;
CC cell;
CC cytoplasm;
CC cytosol;
CC plastid;
CC organelle;
//
