# Supplementary material for: Identification and Comprehensive Genome-Wide Analysis of Glutathione S-Transferase Gene Family in Sweet Cherry (Prunus avium) and Their Expression Profiling Reveals a Likely Role in Anthocyanin Accumulation
Source: Front Plant Sci. 2022 Jul 12;13:938800. doi: 10.3389/fpls.2022.938800 (PMC9315441; doi:10.3389/fpls.2022.938800)
Supplement: Supplementary file 6 [file Table_6.XLSX]

## Sheet: sweet cheryy
Table S6. Fruit RNA-Seq data of Sweet Cherry cultivars (Bing, Lapins, Rainers)
Name	Bing-fruit	Lapins-fruit	Rainers-fruit
Pav_sc0000119.1_g430.1.mk	987	700	286
Pav_sc0000095.1_g790.1.mk	963	574	577
Pav_sc0001196.1_g1310.1.mk	962	841	771
Pav_sc0001124.1_g450.1.mk	958	948	909
Pav_sc0001708.1_g040.1.mk	908	787	554
Pav_sc0000554.1_g2030.1.mk	867	768	889
Pav_sc0001339.1_g170.1.mk	866	264	976
Pav_sc0001990.1_g130.1.mk	856	616	478
Pav_sc0000207.1_g720.1.mk	681	522	519
Pav_sc0002136.1_g320.1.mk	667	186	375
Pav_sc0000599.1_g130.1.mk	552	904	987
Pav_sc0000848.1_g720.1.mk	542	912	566
Pav_sc0000085.1_g320.1.mk	516	462	511
Pav_sc0001196.1_g2210.1.mk	513	900	769
Pav_sc0007796.1_g150.1.mk	972	0	425
Pav_sc0000164.1_g210.1.mk	962	0	0
Pav_sc0001126.1_g250.1.br	849	0	0
Pav_sc0000257.1_g600.1.mk	721	0	972
Pav_sc0000110.1_g140.1.mk	682	0	846
Pav_sc0002998.1_g130.1.mk	682	0	846
Pav_sc0000164.1_g220.1.mk	619	356	0
Pav_sc0007176.1_g020.1.br	586	0	0
Pav_sc0002584.1_g240.1.mk	573	657	0
Pav_sc0001275.1_g020.1.mk	567	554	0
Pav_sc0000164.1_g200.1.br	426	0	0
Pav_sc0001215.1_g320.1.mk	0	708	0
Pav_sc0011895.1_g020.1.mk	0	700	0
Pav_sc0000095.1_g730.1.mk	0	430	0
Pav_co4009309.1_g010.1.br	0	0	0
Pav_sc0000095.1_g650.1.mk	0	0	0
Pav_sc0000095.1_g700.1.br	0	0	0
Pav_sc0000095.1_g710.1.br	0	0	0
Pav_sc0000095.1_g720.1.br	0	0	0
Pav_sc0000095.1_g760.1.br	0	0	0
Pav_sc0000095.1_g770.1.mk	0	0	0
Pav_sc0000095.1_g800.1.mk	0	0	0
Pav_sc0000095.1_g850.1.br	0	0	0
Pav_sc0000103.1_g250.1.mk	0	0	0
Pav_sc0000103.1_g260.1.mk	0	0	0
Pav_sc0000164.1_g180.1.br	0	0	0
Pav_sc0000164.1_g190.1.br	0	0	0
Pav_sc0000164.1_g230.1.mk	0	0	0
Pav_sc0000206.1_g560.1.br	0	0	0
Pav_sc0000207.1_g700.1.br	0	0	0
Pav_sc0000207.1_g840.1.mk	0	0	0
Pav_sc0000207.1_g850.1.mk	0	0	0
Pav_sc0000207.1_g860.1.br	0	0	0
Pav_sc0000359.1_g580.1.br	0	0	0
Pav_sc0000464.1_g360.1.mk	0	0	0
Pav_sc0000474.1_g230.1.mk	0	0	0
Pav_sc0000745.1_g320.1.mk	0	0	0
Pav_sc0000789.1_g340.1.mk	0	0	0
Pav_sc0000877.1_g340.1.mk	0	0	0
Pav_sc0000877.1_g460.1.mk	0	0	0
Pav_sc0000877.1_g470.1.br	0	0	0
Pav_sc0000877.1_g540.1.br	0	0	0
Pav_sc0000877.1_g550.1.br	0	0	0
Pav_sc0000877.1_g580.1.br	0	0	0
Pav_sc0000877.1_g670.1.br	0	0	0
Pav_sc0001708.1_g050.1.br	0	0	0
Pav_sc0001708.1_g060.1.mk	0	0	0
Pav_sc0001708.1_g070.1.br	0	0	0
Pav_sc0001794.1_g270.1.mk	0	0	0
Pav_sc0001794.1_g280.1.mk	0	0	0
Pav_sc0001932.1_g020.1.br	0	0	0
Pav_sc0008627.1_g010.1.mk	0	0	0
Pav_sc0011895.1_g010.1.br	0	0	0
