# Supplementary material for: Identification and Comprehensive Genome-Wide Analysis of Glutathione S-Transferase Gene Family in Sweet Cherry (Prunus avium) and Their Expression Profiling Reveals a Likely Role in Anthocyanin Accumulation
Source: Front Plant Sci. 2022 Jul 12;13:938800. doi: 10.3389/fpls.2022.938800 (PMC9315441; doi:10.3389/fpls.2022.938800)
Supplement: Supplementary file 7 [file Table_7.XLSX]

## Sheet: Primers lists
Table.S7 List of Primers used in qRT-PCR analysis
Pav_sc0000095.1_g650.1.mk	F	GGTGAGAGTTGCCCTGGCTG
	R	ACCCAAAACCTGGCCTGAGC
Pav_sc0000103.1_g250.1.mk	F	ACGACAGAGCCATTGCCGAG
	R	CCGTGCAAGCTCTCCATGCT
Pav_sc0000164.1_g200.1.br	F	TGAAGCTGCTAGGAGCATGGC
	R	CCATGAACGAGCACCGGGAT
Pav_sc0000207.1_g840.1.mk	F	CCCGGTGCTCGTTCATGGAG
	R	TCTAGCTCTTCGCCGGTGGT
Pav_sc0000474.1_g230.1.mk	F	GTGTACGAGGCCAGGCTGAG
	R	ACATGGGGGCGCTCATTGAC
Pav_sc0000848.1_g720.1.mk	F	TAAGGCGTGGTGGGAGGACA
	R	CGCATTGCAGCGGTGGAAAA
Pav_sc0001124.1_g450.1.mk	F	ACTACGCAGCCAAGTACGCC
	R	ATGGACCAAGGCCACGTCAC
Pav_sc0001215.1_g320.1.mk	F	CTCCATCGACGCTTCCCCAC
	R	AAGGTCCTTGTGCTCCCCCT
Pav_sc0001794.1_g270.1.mk	F	GGACCTGCAGAACAAGAGCCC
	R	AAGCTAGCCCAGAAGCGTGC
Pav_sc0002136.1_g320.1.mk	F	GGTGGTTTCCTGCAGCGGAT
	R	TCTTGTCCCCGGAAGAGCCA
Pav_sc0007796.1_g150.1.mk	F	ACTGGCCGATCTGTCCCACT
	R	CTCAGTCCACCACCTCCCCA
Pav_sc0011895.1_g020.1.mk	F	TGGCCTCAGAACCCTCTGCT
	R	TCCCGACCTTGTTGCCATCG
